1 **Title page:**

2

3 **Title: Elongation during segmentation shows axial variability, low mitotic rates, and synchronized**  
4 **cell cycle domains in the crustacean, *Thamnocephalus platyurus***

5

6 **Running title:** Crustacean growth zone dynamics

7

8 **Authors:**

9 Savvas J. Constantinou<sup>a</sup>, Nicole Duan<sup>a</sup>, Ariel D. Chipman<sup>c</sup>, Lisa M. Nagy<sup>b</sup> and Terri A. Williams<sup>a,\*</sup>

10 <sup>a</sup> Biology Department, Trinity College, Hartford, CT, USA

11 <sup>b</sup> Department of Molecular and Cellular Biology, University of Arizona, Tucson, AZ, 85721, USA

12 <sup>c</sup> The Department of Ecology, Evolution and Behavior, The Alexander Silberman Institute of Life Sciences,  
13 The Hebrew University of Jerusalem, Edmond J. Safra Campus, Givat Ram 91904, Jerusalem, Israel

14 \*Author for correspondence (email: [terri.williams@trincoll.edu](mailto:terri.williams@trincoll.edu); ph:860-297-2092; fax: 860-297-2538)

15

16 **Author Present Address:**

17 Savvas J. Constantinou- Department of Integrative Biology, Michigan State University, East Lansing, MI,  
18 USA, 48824

19

20 **Key words:** *arthropod, segmentation, growth zone, mitosis, Wnt, EdU,*

21

22 **Summary Statement:**

23 Posterior growth zone has synchronized cell cycle domains but shows little cell division during segment  
24 addition in a crustacean. Dimensions of the shrinking posterior growth zone change at tagma boundaries.

25

26 **Abstract**

27 Segmentation in arthropods typically occurs by sequential addition of segments from a posterior growth  
28 zone, but cell behaviors producing posterior elongation are not well known. Using precisely staged larvae  
29 of the crustacean, *Thamnocephalus platyurus*, we systematically examined cell division patterns and  
30 morphometric changes associated with posterior elongation during segmentation. We show that cell  
31 division is required for normal elongation but that cells in the growth zone need only divide ~1.5 times to  
32 meet that requirement; correspondingly, direct measures of cell division in the growth zone are low.

33 Morphometric measurements of the growth zone and of newly formed segments suggest tagma-specific  
34 features of segment generation. Using methods for detecting two different phases in the cell cycle, we  
35 show distinct domains of synchronized cells in the posterior. Borders of cell cycle domains correlate with  
36 domains of segmental gene expression, suggesting an intimate link between segment generation and cell  
37 cycle regulation.

38

39 **Introduction:**

40           Arthropods are the most diverse phylum on earth, and much of that diversity derives from the  
41 variability in their segmented body plan. This variability includes segment number, size, and character.  
42 The developmental mechanisms that produce segments have been extensively studied in the model  
43 organism, *Drosophila melanogaster*. But *Drosophila* is atypical among arthropods in that it establishes  
44 segments simultaneously, through progressive spatial subdivision of the embryo (Lawrence, 1992). By  
45 contrast, the vast majority of arthropod species add their segments sequentially, from a posterior region  
46 termed the “growth zone”. In contrast to *Drosophila*, these species elongate as they add segments, thus  
47 posing fundamental questions not addressed by the model system: How does elongation occur in the  
48 posterior? How and to what degree are elongation and segmentation integrated (Chipman, 2008)? While  
49 some mechanisms of elongation are known (e.g., teloblastic growth in malacostracan crustaceans;  
50 Scholtz, 1993), surprisingly little is known about the range of cell behaviors (e.g., cell division or cell  
51 movement) responsible for elongation throughout arthropods.

52           Because most species elongate significantly during segmentation, classical concepts of posterior  
53 growth generally invoke mitosis, either in posterior stem cells or in a vaguely defined posterior region of  
54 proliferation (Snodgrass 1938; Anderson 1967; Anderson, 1973; Davis and Patel, 2002; Liu and  
55 Kaufman, 2005). Cell movement has also been assumed to play a role in elongation in cases where  
56 embryonic shape changes dramatically (Tautz et al., 1994; Liu and Kaufman, 2005) – and is documented  
57 in some cases (Nakamoto et al., 2015) - but mitosis remains a key driver. Despite these assumptions,  
58 cell division and cell movement have rarely been systematically examined: it is simply unknown what  
59 drives elongation and exactly how much “growth” is required in the growth zone (Tautz et al., 1994; Davis  
60 and Patel, 2002; Liu and Kaufman 2005). This lack of documented posterior growth has prompted some  
61 researchers to reject the idea and designate that region the “segment addition region” to avoid confusion  
62 (Janssen et al., 2010).

63           In contrast to our lack of understanding of cellular mechanisms of elongation, the models of the  
64 gene regulatory networks that pattern segments in sequentially segmenting arthropods are expanding  
65 (reviewed in Williams and Nagy, 2017; Auman and Chipman, 2017; Damen 2007; Peel et al., 2005). It is  
66 well established that posterior *Wnt* signaling establishes a posterior gradient of the transcription factor  
67 *caudal* (*cad*), which, through downstream genes, progressively subdivides the anterior growth zone and  
68 eventually specifies new segments (reviewed in McGregor et al., 2009; Williams and Nagy, 2017). In  
69 some systems, posterior *Wnt* signaling is also thought to keep cells in a pluripotent state, presumably  
70 dividing as needed to fuel elongation (Chesebro et al., 2013; Shinmyo et al., 2005, McGregor et al., 2009;  
71 Auman et al. 2017). The precise links between segmental patterning and cell behaviors responsible for  
72 posterior elongation (e.g., division, intercalation/movement, shape change) are only inferred, in part,  
73 because the cell behaviors themselves remain poorly described for many species. For example, are there  
74 many mitotic cells and are they restricted to the growth zone, or do cells from other areas significantly fuel

75 posterior elongation? To fully understand the development and evolution of arthropod segmentation, a  
76 more detailed understanding of the cellular mechanisms by which arthropods elongate and grow is  
77 needed (Peel et al., 2005). That information will provide vital input to our interpretations of function *via*  
78 knock-down/knock-out studies.

79 Our approach has been to quantify the changes in the growth zone during segmentation in three  
80 pancrustaceans as a means of establishing the basis for comparison between taxa: the insects *Tribolium*  
81 (Nakamoto et al., 2015), and *Oncopeltus* (Auman et al., 2017); and the crustacean described here,  
82 *Thamnocephalus platyurus*. *Thamnocephalus*, commonly named fairy shrimp, live in temporary  
83 freshwater ponds (Rogers, 2009). Their life cycle includes desiccation-resistant encysted eggs, giving rise  
84 to commercially available cysts for study (primarily freshwater toxicology, e.g., Alvarenga et al., 2016).  
85 After rehydration, cysts hatch as swimming larvae with three pairs of head appendages and an  
86 undifferentiated trunk. Sequential segment addition and progressive differentiation gradually produce the  
87 adult morphology of eleven limb-bearing thoracic segments and eight abdominal segments, the first two  
88 of which are fused to form the genital region (Linder, 1941; Anderson 1967; Fryer 1983; Moller et al.,  
89 2004).

90 In *Thamnocephalus*, we demonstrate that segments are added at a constant, species-specific  
91 rate. We characterize the growth zone and newest added segment during segment addition using  
92 morphometric measures and find that changes in these measures correlate with position along the body  
93 axis, specifically, they occur at tagma boundaries and the position of the first larval molt (*i.e.* between the  
94 sixth and seventh thoracic segment). Despite expectations for mitosis to drive elongation in this species,  
95 we demonstrate that mitosis in the growth zone is relatively rare; it is required for elongation, just at much  
96 lower rates than anticipated. Examination of cells undergoing DNA synthesis (S phase) reveals discrete  
97 domains of apparently synchronized cells in the anterior growth zone and newest segments. In  
98 *Thamnocephalus*, boundaries of cell cycling domains correlate precisely with *Wnt* and *cad* expression in  
99 the growth zone, suggesting direct regulation of these behaviors by the segmentation gene regulatory  
100 network.

101

## 102 **Results:**

103

### 104 ***Segment addition and morphogenesis occur progressively in Thamnocephalus larvae***

105 *Thamnocephalus* hatches with three differentiated larval head appendages (first antennae,  
106 second antennae and mandibles) that function in swimming and feeding (Williams, 2007). In addition, the  
107 first and second maxillae and approximately three thoracic segments are already specified, as  
108 determined by the expression of the segment polarity gene, *engrailed*. As larvae grow, segments are  
109 added gradually from the posterior growth zone (Fig. 1) and, likewise, mature gradually. Thus, the trunk  
110 typically shows the progression of segment development: segment patterning, segment morphogenesis,  
111 and limb morphogenesis (see Constantinou et al., 2016). Segment patterning occurs in the growth zone

112 (defined as the region posterior to the last *engrailed* stripe and anterior to the telson) and is characterized  
113 by segmental gene expression but no overt morphogenesis. As is common in sequentially segmenting  
114 arthropods, the segments of *Thamnocephalus* form a developmental series along the anterior posterior  
115 body axis, with the more mature, anterior segments undergoing limb morphogenesis while new segments  
116 continue to be specified in the posterior. Expression of *engrailed* (En) at the anterior of the growth zone  
117 indicates that a new segment has been specified. As segments develop, epithelial changes at the  
118 intersegmental regions lead to bending of the epithelium and outpocketing of the ventral to ventrolateral  
119 surface (Fig. 1C). The initial outpocketing is characterized by a highly aligned row of cells that form its  
120 apical ridge. The entire ventrolateral outpocketing eventually forms the limb bud and will begin to develop  
121 medial folds along its margin, producing the anlage of the adult limb branches prior to limb outgrowth  
122 (Williams, 2007; Constantinou et al., 2016).

123

### 124 ***The rate of segment addition is linear as body length doubles***

125

126 To characterize the rate of segment addition, we measured the number of segments, as indicated  
127 by En stripes, in one hour intervals for staged cohorts of 20-30 larvae. Although we find some variability  
128 within each time point, we see a clear trend of linear segment addition (Fig. S1). Segments are added at  
129 a rate slightly less than one segment per hour at 30°C. The regularity of segment addition is unaffected  
130 by either the first molt (at approximately four hours post-hatching, Fig. S2) or the transitions between  
131 addition of thoracic (post-maxillary segments, 1-11), genital (12, 13), and abdominal segments (14-19).  
132 During the course of 18 hours at 30°C, *Thamnocephalus* add 14 segments and the overall length of the  
133 body roughly doubles (Fig. 2A). Despite the regular periodicity of segment addition, the change in body  
134 length at each stage varies, with a noticeable increase following the first molt (Fig. 2B). The overall area  
135 of the trunk also increases at successive larval stages (Fig. 2C) and shows a similar per-stage variability.

136

### 137 ***The growth zone varies during axial elongation and requires growth to produce all segments***

138

139 To find out if the growth zone itself is changing over time and to understand the requirement for  
140 growth as segments are being added, we measured several features in each stage (Fig. 1D; including the  
141 length, width, and area of the growth zone and last added segment; as well as, the overall body length  
142 and trunk area). In general, there is a decrease in most *Thamnocephalus* growth zone measures as  
143 segments are added (Fig. 3). Both the length and the area of the growth zone decrease over time. The  
144 exception to this trend occurs at the first molt, between approximately 6 and 7 En stripes or around 3.75  
145 hours (30°C; dotted lines Fig. 3, Fig. S2). Post-molt, the growth zone increases in length (Fig. 3A,B) and  
146 area (Fig. 3D), which would be expected after release from the cuticle. Although the overall trend of a  
147 successively depleted growth zone might appear intuitively obvious, it is not a given; in the related  
148 anostracan branchiopod, *Artemia franciscana*, we found that the growth zone maintains its size through

149 the addition of the first 9 En stripes (Fig. 3C). The general decrease in the *Thamnocephalus* growth zone  
150 size plateaus as the thoracic segments are added and then again when abdominal segments are added  
151 (see Fig. 3D, E, G; tagmata are separated in the graphs by solid lines).

152

153 To examine the significance of tagmata during segment addition, axial positions were split into  
154 four groups for statistical analysis, a measure's "tagmal designation" was defined by the position along  
155 the body axis of the last added *engrailed* stripe: *engrailed* stripes 3-6 = thoracic pre-molt; 7-11= thoracic  
156 post-molt; 12-13 = genital; 14-17 = abdominal. We find that axial position is significant in most  
157 morphometric measurements, when individuals are grouped by tagmata and compared (Fig. S3). For  
158 example, each tagma forms segments from a successively smaller growth zone, whether measured by  
159 length (Fig. 3A, B) or area (Fig 3D). The one measure that remained notably steady between tagmata  
160 was the 'growth zone width A' measure, which is the width of the last En stripe (Fig. 3H). We further test  
161 these trends by analyzing morphometric measurements using Principal Component Analysis (PCA) and  
162 find significant differences by axial position (Fig. 4). PC1-PC3 explain 93.4% of the variation in the data  
163 and are different by 'tagma' (Type II MANOVA;  $F_{9,1272}=103.06$ ,  $p<0.001$ ). PC1 explains 67.5% of the  
164 variance and separates by 'tagma'; a linear model of PC1 by axial position suggests all groups are  
165 significantly different (adj  $R^2= 0.814$ ;  $p<0.001$ ). Intriguingly, the thoracic segments added pre- and post-  
166 molt formed groups that are as distinct as the other 'true' tagmata.

167

168 In addition to linear measures, we counted numbers of cells (nuclei) along our measured linear  
169 dimensions, to characterize growth zone changes based on the biological unit of cell number. As can be  
170 seen, (compare Fig. 3B to A, and Fig. 3F to E), the trends based on cell counts parallel those of linear  
171 dimensions, showing that during this phase of segmentation there is little change in cell shape that would  
172 skew the two different types of measurement (linear dimension and cell counts). However, the cell counts  
173 are interesting because they describe the changes in terms of the biological unit of cellular dimensions.  
174 For example, we find that the smaller segments that are added posteriorly are only 2-3 cells long as  
175 compared to 5-6 cells long in the first segments added.

176

177 During the time we tracked segment addition, approximately 14 segments were added. The body  
178 length increased about 140%, from 0.41 mm to 0.98 mm (Fig. 2A). The total area of the 14 added  
179 segments - when measured just as each is being formed in successive stages - represents an area  
180 equal to 0.029 mm<sup>2</sup>. The area of the initial (hatchling) growth zone is 0.0118 mm<sup>2</sup> or only about 40% of  
181 the total area ultimately needed to add all the segments (Fig. S4). During segmentation, the growth zone  
182 shrinks (Fig. 3A, D) but even a completely depleted growth zone would only account for the addition of  
183 approximately the first four added segments. The growth zone needs to more than double to produce the  
184 material for new segments; it cannot account for all additional segments without some form of growth.

185

186 ***The growth zone has few mitotic cells and only a low requirement for growth.***

187

188 The larval epithelium is anchored to its cuticle in *Thamnocephalus*, making significant cell  
189 movements unlikely. Thus, to characterize growth in the growth zone, we focused on mitosis. We first  
190 measured mitosis in the growth zone by identifying cells clearly in metaphase, anaphase, or telophase  
191 using nuclear staining (Hoechst). The highest numbers of mitoses scored in this way were measured  
192 immediately following hatching, with an overall trend of fewer mitoses in the growth zone as segment  
193 addition continues (Fig. 5A, grey bars). Mitotic numbers increase slightly just prior to and after the first  
194 molt (dotted line in Fig. 5A), but overall mitosis counts are low (ranging from about 2 to 13 cells). For  
195 Hoechst mitotic counts, we also scored the orientation of the mitotic spindle and found that mitoses in the  
196 *Thamnocephalus* growth zone are oriented parallel to the anterior-posterior (AP) body axis. An average of  
197 80% of all cells undergoing division in the growth zone are oriented in the AP direction, regardless of  
198 which segment is being produced (Fig. 5B). In some larval stages as many as 90% of mitotic cells in the  
199 growth zone are AP oriented. While, mitotic cells in the growth zone are almost always oriented parallel to  
200 the AP body axis, mitoses in the anterior, newly specified, segments are generally oriented transversely  
201 to the AP body axis (Fig. 5D, not quantified).

202

203 To provide a corroborative measure of mitosis, we scored cells that bound to antibodies against  
204 phosphorylated histone H3 (pH3; Hendzel et al., 1997). We found that measures of pH3 staining are  
205 consistent with the measures obtained by Hoechst and that even the greater number of cells in M phase  
206 revealed by this method (Fig. 5A, black bars; 2.4 x more on average). Both measures confirm that total  
207 mitotic activity in the growth zone is much less than anticipated by simple overall body elongation. The  
208 Hoechst and pH3 measures sometimes showed poor correlation within an individual (Fig. S5). pH3  
209 immunoreactivity is typically initially detected in prophase and fades during late anaphase (Hendzel et al.,  
210 1997; Giet and Glover, 2001). While the pH3 signal is required for cells to enter anaphase (Le et al.,  
211 2013), the stages of the cell cycle in which pH3 immunoreactivity can be detected vary between species  
212 (Hans and Dimitrov, 2001). We found in *Thamnocephalus*, immunoreactivity of pH3 fades prior to  
213 anaphase (data not shown). Thus, for any given specimen, cells scored in metaphase, anaphase, or  
214 telophase with Hoechst were not always a subset of those scored by pH3 (prophase/metaphase;  
215 Supplementary Table 1) and single photographs of either Hoechst or pH3 used to represent typical  
216 mitoses may not represent average mitotic rates. Strikingly, even the greater numbers of cells in mitosis  
217 revealed by pH3 staining are low relative to the total number of growth zone cells (Fig 5C).

218

219 We combined these direct measures of mitosis with our cell counts describing growth zone area  
220 to produce estimates of how much division might be required for segment addition. Based on both direct  
221 cell counts of growth zone length and width, and calculated cell counts of growth zone area (Fig. S4), the  
222 cells in the initial growth zone would need to divide about 1.5 times to produce enough cells to account for



223 the addition of all the new measured segments (14) in this study. While this number seems surprisingly  
224 low, it is supported by our direct measures of mitosis compared to total growth zone cell numbers (Fig.  
225 5C): mitotic cells only make up 1-4% of the cells in the growth zone. Consistent with this observation, the  
226 area of the larval trunk increases over time (Fig. 2C), much more rapidly than the growth zone or last  
227 segment areas decrease, showing that the apparent growth of larvae is disproportionately in the already  
228 specified segments, and not in the growth zone *per se*.

229

### 230 ***Edu incorporation reveals distinct domains of cell cycling***

231 Mitotic scores in fixed animals give only a snapshot of cell cycle behavior and potentially  
232 underestimate rates of cell division. To capture a longer time-course of cell cycling, we exposed animals  
233 to 5-ethynyl-2'-deoxyuridine (EdU), a nucleotide analogue incorporated into cells during active DNA  
234 synthesis (S phase). A 30 minute exposure to EdU prior to fixation labeled cells actively synthesizing  
235 DNA during that time. This method revealed surprisingly stable domains of cell cycling in the larvae (Fig.  
236 6-7).

237

### 238 *The growth zone and newly added segment form three distinct EdU domains*

239

240 In early larval stages analyzed in detail (0, 1, 2, 3, 4h cohorts), we find a repeated pattern of EdU  
241 incorporation that subdivides the growth zone into anterior and posterior domains: the posterior growth  
242 zone has apparently randomly positioned cells that are undergoing S phase, while the anterior growth  
243 zone is devoid of cells cycling through S phase. Just anterior to the growth zone, in the newest specified  
244 segment, all cells undergo S phase synchronously (all cells initiate DNA synthesis within a 30-minute time  
245 window). That is, a band of EdU-expressing cells fills the last added segment, sometimes with additional,  
246 adjacent cells extending laterally into the penultimate segment (Fig. 6A, B).

247

248 Within all staged cohorts, these three domains were present and distinct. The two anterior  
249 domains - the EdU synchronous band and the EdU clear band - did not vary. The most posterior domain,  
250 where apparently random cells undergo S phase, was more variable. In that region, there are three  
251 general classes of EdU incorporation: staining in many growth zone cells (e.g., Fig. 6A), staining in few  
252 growth zone cells (e.g., Fig. 6D), or bilateral clusters of cells anterior to the telson. Furthermore, in the  
253 posterior growth zone, measures of mitosis (pH3) are low compared to the numbers of cells in S phase,  
254 suggesting these cells are cycling at low and uncoordinated rates or have variable lengths of time in G<sub>2</sub>.  
255 By contrast, cells in the EdU band in the last segment appear synchronous. We tested this by double-  
256 labeling specimens with pH3 and EdU to see if there were cells that had entered mitosis within the EdU  
257 domain of the last specified segment. We found that pH3-positive cells are virtually always excluded from  
258 this EdU domain, suggesting that cells within the domain are truly synchronizing their behavior at the

259 anterior growth zone/newly specified segment boundary, and are maintained in a similar phase of the cell  
260 cycle (Fig. 6C-D).

261

262 *Segments follow a stereotyped pattern of S phase as they develop*

263

264 In contrast to the three distinct stable domains of the growth zone region, we see stage-specific  
265 patterns of S phase (identified through EdU incorporation) in the more anterior specified segments  
266 examined at different stage cohorts. As the animals add new segments from 0 to 4 hours, cells in the  
267 anterior segments begin to successively enter S phase (Fig. 7, higher magnification in Fig. 7C, D). This  
268 occurs because each segment goes through a stereotyped pattern of S phase cycling as it develops (Fig.  
269 7A, B): first all cells in the segment are in S phase (when the segment is first specified), then no cells are  
270 in S phase except those of the neuroectoderm; then S phase is initiated in cells at the apical ridge of the  
271 ventral outpocketing segment (in cells that express *Wnt1*, and other *Wnt* genes, just anterior to En;  
272 Constantinou et al., 2016); S phase then spreads into other cells throughout the segment.

273 Thus, the overall, appearance at any larval stage depends on the number of segments specified.  
274 In 0 hour animals, the two relatively small maxillary segments anterior to the thorax show high levels of  
275 EdU incorporation, although thoracic segments one through three, which are already expressing  
276 segmentally iterated stripes of En, do not. As animals get progressively older (1-4 hours post hatching)  
277 and add more segments, the pattern of anterior segments undergoing S phase continues towards the  
278 posterior (Fig. 7).

279

280 ***Domains of cell cycling in the growth zone correspond to boundaries of segmentation gene***  
281 ***expression***

282

283 We analyzed expression of *caudal* and *Wnt* genes relative to EdU incorporation in the posterior,  
284 looking specifically at three *Wnts* shown to have staggered expression in the growth zone: *Wnt6*, *WntA*,  
285 and *Wnt4* (Constantinou et al., 2016). Expression of *cad* is non-graded and extends throughout the  
286 growth zone to the border with the telson (Fig. 8A). *WntA* and *Wnt4* expression form two exclusive  
287 domains within the growth zone, *WntA* in the anterior and *Wnt4* in the posterior (Constantinou et al.,  
288 2016). Strikingly, the domains of *Wnt* expression map precisely to the domains of EdU incorporation in  
289 the growth zone: *WntA* expression in the anterior corresponds to cells lacking EdU incorporation (Fig. 8B)  
290 and *Wnt4* in the posterior corresponds to cells with scattered EdU incorporation (Fig. 8C). More anteriorly,  
291 the last two stripes of *Wnt4* expression, *i.e.* the most recently formed, appear to flank the band of  
292 coordinated EdU positive cells (Fig. 8C). The anterior border of both *cad* and *WntA* also coincides with  
293 the posterior border of the EdU domain in the newest segment. Posterior *Wnt6* expression is restricted to  
294 the telson, that is, behind the region of relatively dense cells that make up the posterior growth zone (Fig.



295 8D). Interestingly, cells that form the apical ridge of the limb bud that express *Wnt6* are also those cells  
296 that show the early EdU incorporation apically (Fig. 8E).

297

## 298 Discussion

299

### 300 Is there growth in the “growth zone”?

301

302 In sequentially segmenting arthropods, axial elongation appears coupled to segmentation in a  
303 way that supports the assumption that posterior segmentation is linked to posterior growth. This  
304 assumption has been both explicitly recognized (Davis and Patel, 2002; Peel et al., 2005) and challenged  
305 (Janssen et al., 2010), leading to a more neutral description of the posterior as a segment addition region  
306 and not a growth zone. Furthermore, it is clear in some insects that classical views of a proliferative  
307 posterior growth zone are inadequate to explain changes in embryo shape that can accompany  
308 segmentation during embryogenesis, and that cell movement plays a significant role in some cases.  
309 These cell movements can drive rapid elongation as live imaging and clonal analysis have begun to  
310 show, (for example, *Drosophila*, Irvine and Wieschaus, 1994; *Tribolium*, Benton et al., 2013; Nakamoto et  
311 al., 2015). Nonetheless, the phenomena responsible for posterior elongation remain understudied,  
312 especially compared with the exploration of patterning genes regulating segmentation. They have been  
313 studied systematically in two insects - *Tribolium* (Nakamoto et al., 2015) and *Oncopeltus* (Auman et al.,  
314 2017) - both of which show a limited requirement for growth. Here, we used careful staging to examine  
315 larvae of the crustacean *Thamnocephalus*, whose mode of segmentation appears to have a more  
316 obvious requirement for posterior growth than typical insect embryos since segmentation occurs in an  
317 epithelium that is anchored to an overlying cuticle, not permitting extreme changes of larval shape. The  
318 need for growth could be met by high levels of posterior mitosis, as is assumed for a canonical growth  
319 zone (Mayer et al., 2010).

320

321 Matching the expectation for growth, we document a ~140% increase in body length during  
322 segment addition in *Thamnocephalus*. Unexpectedly, however, systematic examination of mitosis in the  
323 growth zone - using conventional means of Hoechst staining or pH3 immunohistochemistry - itself  
324 revealed only <5% of cells in mitosis at any given stage. To assess the significance of these mitosis  
325 counts strictly with respect to a requirement of posterior growth *versus* overall larval growth, we restrict  
326 our calculations of growth to the new tissue that forms each segment as it is added. Based on measures  
327 of new segment area and calculations of the area of the initial field of cells that makes up the growth  
328 zone, we estimate that cells in the growth zone need only divide between 1 and 2 times (~1.5X) to  
329 provide enough tissue to form the new segments measured. This calculation is only a rough estimate, but  
330 even so, we find it surprisingly low. We emphasize the misleading nature of overall embryo/larval  
331 elongation when analyzing the role of the growth zone in forming new tissue for adding segments.

332 Indeed, in the few species in which mitosis has been examined during sequential segmentation (Freeman  
333 1986; Mayer et al., 2010; Rosenberg et al., 2014; Auman et al., 2017; Cepeda et al., 2017; this study),  
334 mitosis in the already specified segments is extensive and no doubt contributes extensively to overall  
335 elongation. This leads to a false expectation of high mitosis in the growth zone and at the same time  
336 potentially obscures a low but real requirement for posterior growth. Interestingly, our estimates of growth  
337 zone cells needing to divide only 1-2 times to meet growth requirements parallels our findings in insects:  
338 in *Oncopeltus*, growth zone mitoses were low and their localization revealed only by averaging over a  
339 number of staged embryos (Auman et al., 2017); in *Tribolium*, clones of cells labeled in the blastoderm  
340 divided about twice prior to germband elongation (Nakamoto et al., 2015; Edgar and O'Farrell, 1990). Our  
341 estimate for posterior cell division in *Thamnocephalus* also parallels zebrafish data in which progenitor  
342 cells divide only one time after the presomitic mesoderm is established (Bouldin et al., 2014). Average  
343 numbers of cells in mitosis in the growth zone do vary by stage, and we find the greatest number of  
344 mitotic figures in the growth zone immediately post-hatching as well as just before and after the first molt.  
345 The latter is not surprising, since growth *via* molting is often accompanied by mitosis. In summary, despite  
346 a measurable requirement for increased area to account for the addition of new segments, the predicted  
347 amount of cell division required to make the additional tissue is low and is corroborated by the low counts  
348 of mitoses based on direct measures of cells in the growth zone.

349

350 ***Synchronized cell cycle domains in the anterior growth zone/new segment region map to***  
351 ***boundaries of segmental gene expression***

352

353 The most surprising feature of trying to quantify cell cycling in the growth zone in  
354 *Thamnocephalus* arose from exposing larvae to a nucleotide analogue (EdU) to visualize cells in S  
355 phase. This unexpectedly revealed distinct S phase domains, demonstrating a kind of spatial coordination  
356 in cell cycling not captured by examining mitosis alone. We found two stable cell cycle domains  
357 associated with segmentation: a band of cells not undergoing S phase in the anterior growth zone and a  
358 synchronized band of cells undergoing S phase in the most recently specified segment. (Cells in the most  
359 posterior growth zone are variably in S phase.) The best-known cell cycle domains are the mitotic  
360 domains in the embryo of *Drosophila* (Foe, 1989). Among arthropods, we do not know of a comparable  
361 case of highly synchronized cell cycle domains in the growth zone *per se*. However, although not  
362 apparently as tightly synchronized, we found a similar regionalization of cell division in the growth zone of  
363 *Oncopeltus* (Auman et al., 2017): data from staged pH3-stained embryos were combined to generate a  
364 heat map of cell division, revealing a region of low cell division in the anterior of the growth zone, and high  
365 cell division in the posterior. By contrast, examination of *Tribolium* using EdU exposure showed no  
366 apparent regionally distinct incorporation within the growth zone (Cepeda et al., 2017).

367

368 To interpret the fixed patterns of S phase domains in *Thamnocephalus*, we followed cell domains  
369 mapped to analogous positions in carefully staged larvae. This leads to the following hypothesized  
370 sequence of cell behaviors: cells in the very posterior growth zone are undergoing low levels of  
371 uncoordinated cycling. Then, as they reach the anterior growth zone, they are coordinated and  
372 synchronized, perhaps by a cell cycle arrest. After they are newly specified into a segment, all cells begin  
373 to undergo S phase in a synchronized fashion. This entire progression of cell cycling is strikingly similar to  
374 that found in zebrafish somitogenesis. In zebrafish, progenitor cells first cycle in the posterior, then arrest  
375 in S/G2 as they transit the presomitic mesoderm to form a somite, then begin to cycle again due to  
376 upregulation of *cdc25* after somite formation (Boudin et al., 2014). Compartmentalized expression of  
377 *cdc25* in the tailbud is required for both extension of the body during somitogenesis and normal  
378 differentiation of posterior progenitor cells. We have begun to characterize the *cdc25* (*string*) homolog as  
379 well as other regulators of cell cycle in *Thamnocephalus* (Duan, Nagy, and Williams, in prep).

380  
381 We did compare the domains of cells in S phase in *Thamnocephalus* with expression of genes  
382 known to regulate posterior segmentation and found that boundaries of gene expression map precisely to  
383 boundaries of cell cycling. Both *Wnt* and *cad* are known to function in sequential segmentation in a  
384 number of arthropods by maintaining the growth zone and have been hypothesized to maintain cells in a  
385 proliferative state (Chesebro et al., 2013; Shinmyo et al., 2005 and McGregor et al., 2009; Hayden et al.,  
386 2015). The regulatory interactions in *Thamnocephalus* appear somewhat atypical due to the division of  
387 the growth zone by distinct *Wnt* expression, at least compared to the handful of arthropods that have  
388 been assayed for multiple Wnts: *Achaearanea tepidariorum* (Janssen et al., 2010), *Strigamia* (Hayden  
389 and Arthur, 2014), *Glomeris* (Janssen et al., 2004; 2010), *Tribolium castaneum* (Bolognesi et al., 2008;  
390 Janssen et al., 2010), and *Drosophila melanogaster* (reviewed in Murat et al. 2010).

391  
392 Nonetheless, in all arthropods examined there are distinct regulatory signals in the anterior and  
393 posterior growth zone, where commonly *Wnt/cad* signaling in the posterior regulates pair-rule and or  
394 *Notch* pathway signaling in the anterior growth zone. Our finding of anterior and posterior regionalization  
395 of cell behaviors in the growth zone that map to segmental gene expression is similar to what we found in  
396 *Oncopeltus*: the region of low cell division in the anterior of the growth zone is coincident with striped  
397 *even-skipped* (*eve*) and *Delta* expression, versus high cell division in the posterior coincident with *cad*  
398 and broad *eve* expression. Given the emerging model that posits a regionalization of the growth zone into  
399 anterior and posterior domains based on data from the regulatory network specifying segments (Auman  
400 et al., 2017), it will be interesting to examine additional species for regionalized cell behaviors in the  
401 growth zone that we hypothesize represent a general pattern for arthropod growth zones (Auman et al.,  
402 2017).

403  
404 ***Cell division in the Thamnocephalus growth zone is oriented in the anterior/posterior body axis.***

405

406           In addition to quantifying mitoses in the growth zone, we measured the orientation of mitosis and  
407 found that almost all cells are oriented along the AP body axis. AP oriented mitoses can bias growth,  
408 impacting elongation *via* cell division, as da Silva and Vincent (2007) demonstrate for *Drosophila*  
409 germband elongation. Whether it is important for elongation in other arthropods is unclear. It has been  
410 described in *Artemia* (Freeman, 1986), who found as we do AP orientation in posterior cells but oblique  
411 and transverse within segmented regions. It has also been described in malacostracan crustaceans,  
412 where two rounds of AP oriented cell division in cells budded from the posterior teloblasts establish four  
413 rows of cells that form the initial segmental anlage (Dohle et al., 2004; Scholtz, 1996). Given the low rates  
414 of mitosis used by *Thamnocephalus*, it is unclear what impact oriented mitosis might have on elongation,  
415 *per se*. There could be other functions for oriented cell division, *e.g.* the efficient addition of new  
416 segments could be improved by orderly cell arrays, or precise molecular gradients may require cells in a  
417 particular orientation. Disrupting regulators of planar cell polarity in the growth zone epithelium could shed  
418 light on these potential functions.

419

#### 420 **Changes in the growth zone are linked to different body tagma.**

421

422           We document that the growth zone shrinks over time in *Thamnocephalus*: the posterior field of  
423 cells is depleted as segments are added. However, this decrease is not simply monotonic, but varies by  
424 the particular tagma in which segments are being added. Analysis of various morphometric measures  
425 shows that the dimensions of the growth zone as well as the newest segmental anlage are statistically  
426 smaller when generating abdominal *versus* thoracic segments. This correlation is intriguing. It is known in  
427 vertebrates that extension of the embryo, while a continuous process, relies on different cell populations  
428 when forming the trunk *versus* tail (Wilson et al., 2009). The switch from trunk to tail is specifically  
429 regulated and mutants in *growth/differentiation factor 11 (Gdf11)* can lengthen the trunk by extending  
430 onset of the switch (Jurberg et al., 2013; McPherron et al., 1999). While arthropod segmentation is  
431 phenomenologically quite different from vertebrates - relying on the subdivision of an epithelial sheet  
432 *versus* specification of motile, mesenchymal cells - we find it intriguing that our measures of the growth  
433 zone correlate with tagma boundaries. This suggests that, in arthropods, very early segmental anlage are  
434 integrating different patterning signals along the body axis, and may similarly show some switch in cellular  
435 behaviors involved with early segment formation in different tagma. In this study we focused on only  
436 thoracic segments in more cellular detail but in the beetle *Tribolium*, abdominal segments are formed from  
437 much more elongated cell clones than thoracic segments (Nakamoto et al., 2015).

438

439           Surprisingly, we also find that thoracic segments formed either before or after the first molt are as  
440 significantly different from one another as are between-tagma differences. The cause of this correlation is  
441 not entirely clear, there could be a change in mechanical constraint imposed by the cuticle, given that one

442 notable change at the first molt is that the telson elongates; or there could be differences within thoracic  
443 segments due to hormonal changes that accompany the molt. To ensure that the hatchling animals as a  
444 group (with three thoracic segments and noticeably larger growth zone dimensions, Fig 3.) were not  
445 forcing differences in the pre- and post-molt thoracic groups, we conducted an exploratory data analysis  
446 of PCA, removing the hatchling individuals. Pre- and post-thoracic groups still separated and were  
447 significantly different (data not shown, PCA analysis available on Github).

448  
449 The morphometric correlations with tagma do not have a corresponding temporal variation: the  
450 rate of segment addition is constant in *Thamnocephalus* - under various culture conditions and including  
451 nearly all of segment addition (17 of 19 segments), encompassing multiple tagmata. A constant rate is  
452 consistent with early measures done in less controlled conditions (Williams et al., 2012) and in the one  
453 other branchiopod crustacean in which it has been measured, *Artemia* (Weisz, 1946; Williams et al.,  
454 2012). By contrast, in insects, while rarely measured, segment addition rate shows some variability,  
455 specifically with tagmata. In *Tribolium*, segmentation rate varies depending on the segments being added:  
456 the change occurs at the boundary between thorax and abdomen and correlates with a change in cell  
457 movement (Nakamoto et al., 2015). We hypothesized that the slowing of segment addition prior to the  
458 rapid addition of abdominal segments was necessary for the extreme cell movements that accompany  
459 abdominal segmentation. *Oncopeltus fasciatus*, an insect that only adds abdominal segments  
460 sequentially, has a constant segmentation rate and no gross changes in cell movement or behaviors  
461 (Auman et al, 2017). Sampling additional insects, where both thoracic and abdominal segments are  
462 added sequentially, would increase our understanding of these phenomena, particularly how  
463 segmentation rate may change at axial position boundaries. Again, we find changes in segments  
464 associated with tagma boundaries at their very inception.

465  
466 Interestingly, one dimension that remains relatively constant throughout the window we measured  
467 is the width of the newly added segment. If the growth zone is roughly a trapezoid with three sides formed  
468 by the lateral body margins and the anterior border of the telson, the final side is the width of the last En  
469 stripe. Although the overall trapezoidal shape can vary, this is because the anterior telson width and the  
470 length of the lateral margins vary, the width of the last En stripe remains the same. Intriguingly this  
471 measure was also relatively constant during the sequential segmenting phase in *Oncopeltus* (Auman et  
472 al., 2017).

473  
474 Finally, we note that the absolute dimensions we measured raise some interesting questions  
475 about patterning. Over the course of segment addition that we documented, the length of the growth zone  
476 shrinks from about 18 to 5 cells long and the newly specified segments decrease in length (5 to 2 cells).  
477 If, as we infer from gene expression data, there is a segmentation clock with varying *Notch* and/or pair-  
478 rule signaling (personal observation), the oscillations of gene expression are occurring over very different

479 cellular dimensions at different larval stages. It will be interesting to explore the spatial and temporal  
480 dynamics of the gene regulatory network that periodically produces new segments as the growth zone  
481 shrinks by two thirds.

482

### 483 ***Cell cycle domains in anterior segments***

484

485 Examining EdU incorporation throughout the body in any arbitrary specimen shows only what is  
486 apparently a large number of cycling cells. That is, at first glance these patterns of EdU incorporation  
487 appear somewhat random and widespread, but strikingly regular patterns of incorporation emerge from  
488 comparisons of a number of precisely staged larvae (Fig. 7). During early development, we see a  
489 progression of cells undergoing S phase from anterior to posterior in newly specified segments. Over time  
490 any one segment goes from no cells in S phase, to neuroectoderm in S phase, to apically located cells in  
491 S phase, to most cells in S phase. This suggests a regular progression of cell cycling coupled to the  
492 visibly regular progression of morphogenesis in the specified segments (Williams, 2007; Constantinou et  
493 al., 2016). Indeed, the synchronization of cell cycle in the early segmental anlage may be needed to  
494 accommodate or even drive the subsequent morphogenesis of the limb bud. Freeman et al. (1992) argue  
495 that increased cell density (resulting from mitosis) was required for epithelial bending that generates the  
496 outpocketed limb bud in the related crustacean, *Artemia*.

497 Intriguingly, the pattern of Edu incorporation we describe in *Thamnocephalus* pattern bears a  
498 striking resemblance to the domains of pH3 expressing cells in the wasp *Nasonia*, that similarly appear to  
499 progress from anterior to posterior during embryonic segmentation of successively older embryos  
500 (Rosenberg et al., 2014). Rosenberg et al., (2014) document a series of mitotic domains lying exclusively  
501 between segmental eve stripes (at least in early embryonic stages). Interestingly, Foe (1989) found that  
502 the boundaries of mitotic domains in *Drosophila* also corresponded to segmental boundaries (En stripes).  
503 Thus, the cell cycle domains in these three species all are tied to segmental boundaries. This kind of  
504 domain-specific, timed cell cycling, bespeaks a tightly controlled integration of cell division and segment  
505 patterning. The presence of this phenomenon in distantly related arthropods begs for comparative  
506 analysis among other arthropod groups to determine if this cell behavior is an ancestral or derived trait.

507

### 508 **A summary of growth zone cell dynamics in *Thamnocephalus***

509

510 In *Thamnocephalus*, we find a growth zone that is depleted over time (shrinking cell field) while  
511 being replenished by cell division. The amount of cell division in the growth zone is low and the rate of cell  
512 cycling appears to be slower in the growth zone than in the newly specified segments. Cell division within  
513 the growth zone is aligned along the AP body axis although the impact of this on elongation of the body is  
514 predicted to be small relative to the increase in length caused by the rapid growth of segments once they  
515 are specified. The growth zone has two distinct domains (Fig. 9): a posterior *Wnt4* expressing region that



516 has some cells undergoing S phase and M-phase and an anterior *WntA* expressing region that has no  
517 cells in S phase. Once a segment is specified, the cells of that segment enter S phase in a synchronous  
518 fashion. Newly specified segments then undergo a patterned sequence of entering S phase, starting with  
519 neuro-ectoderm, then the segmental apical ridge, before spreading broadly throughout the segment,  
520 forming an AP pattern of cell cycling along the body axis. While these growth zone features are stable in  
521 different stages, other growth zone features change in association with tagma in which segments are  
522 produced (e.g., linear dimensions). These kinds of cellular dynamics are only beginning to be measured  
523 in other species and yet already show a number of intriguing characteristics that may be more  
524 widespread among sequentially segmenting arthropods and are likely a source of evolutionary variability  
525 underlying the segmentation process: the surprisingly low rates of posterior mitosis, the apparently tight  
526 regulation of cell cycle at the growth zone/ new segment border, resulting in coordination or  
527 synchronization of cell cycling, and a correlation between changes in the growth zone and tagma  
528 boundaries.

529

## 530 **Methods:**

531

### 532 ***Thamnocephalus platyurus* culture and fixation**

533 *Thamnocephalus platyurus* cysts (MicroBioTests Inc, Belgium) were hatched in 1:8 EPA  
534 medium:distilled water solution (EPA medium- 0.0537 mM KCl, 1.148 mM NaHCO<sub>3</sub>, 0.503 mM MgSO<sub>4</sub>,  
535 and 0.441 mM CaSO<sub>4</sub>) at pH 7.0 and ~27°C under a full spectrum aquarium lamp (T8 Ultrason, ZooMed).  
536 For precisely staged animals, hatchlings were collected every 15 minutes, raised at 30°C under  
537 fluorescent light (~3500 lux) in a Precision 818 incubator. Animals were reared in 6-well cell culture  
538 dishes (~5 mL fluid per well) and fed 1 ul of food at time of collection. 4-18H animals received an  
539 additional 1 ul of food after a 60% water change at the midpoint of their rearing time while 0-3 hour  
540 animals were not fed since they are utilizing yolk reserves. Food consisted of a solution of yeast and  
541 commercially available fry food (Hikari First Bites) made fresh each day in 1:8 EPA medium. Animals  
542 were fixed for 30 minutes on ice in 9% formaldehyde/ fix buffer (phosphate buffered saline supplemented  
543 with 70 mM EGTA) and then dehydrated to 100% methanol in a series of washes (2-3 minutes at 25%,  
544 50%, and 75% methanol). Fixed larvae were stored at 0°C in 100% methanol.

545

### 546 ***Artemia franciscana* culture and fixation**

547 *Artemia* were raised in a 2.5 gallon tank at 25°C, 30-35ppt salinity using artificial sea salts, with  
548 continuous aeration and continuous full spectrum light. Newly hatched larvae were collected in timed  
549 intervals and were fed a mixture of yeast and algae (see above). Animals were fixed as *Thamnocephalus*  
550 (above) but with the addition of 0.1% Triton to the buffer.

551

### 552 ***Immunohistochemistry***

553 Immunohistochemistry protocols follow Williams et al. 2002. We visualized Engrailed using  
554 En4F11 (gift from N. Patel) and dividing cells using pH3 (anti-phospho-Histone H3 (Ser10) Antibody;  
555 Millipore) at 1  $\mu\text{g}/\text{mL}$ . Specimens were counterstained with Hoechst, mounted in mounting medium (80%  
556 glycerol supplemented with 0.2M TRIS buffer and 0.024M *n*-propyl gallate) using clay feet on coverslips  
557 to prevent distortion, and photographed on a Nikon E600 Ellipse epifluorescence microscope and a Spot  
558 Insight QE digital camera (Diagnostic Instruments, Sterling Heights, MI, USA) and Spot Advanced  
559 software.

560

### 561 ***EdU exposures and antibody or in situ doubles***

562 Animals were exposed to 0.6 mM EdU for either 15 or 30 minutes just prior to fixation. EdU was  
563 visualized through the Click-iT® EdU Alexa Fluor® 488 Imaging Kit (Thermo Fisher Scientific) as  
564 described in the manufacturer's manual with a final concentration of 1  $\mu\text{M}$  sodium azide. For pH3  
565 doubles, pH3 was then visualized as above. Specimens were counterstained with Hoechst and mounted  
566 in 70% glycerol. Photographs were taken as described above. For *in situ*/EdU doubles, animals that had  
567 been exposed to EdU 30 minutes prior to fixation first underwent *in situ* hybridization for *caudal* and *Wnt4*,  
568 *WntA*, *Wnt6* as described previously (Constantinou et al., 2016). Then, after washing out the NBT/BCIP  
569 developing solution, animals were washed in 0.1% PBTrition, and processed through the Click-It reaction,  
570 as above.

571

### 572 ***Molting***

573 Individual animals were collected at hatching ( $t=0$ ) and allowed to swim freely in 1 mL of pond  
574 water in a 24-well plate (Falcon). The timing of the first molt was determined by observing single  
575 specimens under a dissecting scope every 5 minutes. The molt was visible as a transparent membrane.  
576 Immediately following the molt, the animals also displayed a characteristic behavior: individuals stayed at  
577 the bottom of the well and combed the setae on the antennal exopod by repeatedly pulling them between  
578 the mandible and gnathobasic spine. After the first molt, the posterior trunk of the animal was elongated  
579 compared to the bean shaped trunk before the first molt (Fig. 1 provisional citation) which is reported for  
580 other branchiopods (Dahms et al., 2006). The setae on the gnathobasic spine become branched,  
581 resembling a bottle-brush, compared to the non-setulated setae before the first molt (Fig. S2).

582

### 583 ***Measured and calculated growth zone dimensions***

584 All measurements were made directly on the photographs within the Spot software except  
585 number of mitotic cells in the growth zone which were counted in preparations under the microscope.  
586 Growth zones measures were confined to the ventral surface since that is the where the active segmental  
587 patterning is focused and the growth zone region does not differ materially between dorsal and ventral  
588 (Fig. S6). Measures were defined as follows (Fig. 2)

- 589 • Body Length (BL): Measurement from the most anterior head region to anus through the midline.

- 590 • Engrailed Stripes (En): The number of En stripes posterior to the maxillary stripes. To be scored,  
591 the En stripe must extend from the lateral edge of the animal and connect across the ventral  
592 surface forming a complete line (i.e., the presence of few, scattered En-expressing cells was not  
593 scored as a new segment).
- 594 • Growth Zone Length (GZ Length/cells): The growth zone length is measured at the midline from  
595 just posterior to the last En stripe to the anterior edge of the telson (which is marked by change in  
596 cell density easily seen with Hoechst staining). Cell counts (numbers of nuclei) along this line  
597 were also recorded.
- 598 • Growth Zone Width “A” (GZ Width A/cells): This measure is from one lateral edge to another just  
599 posterior of the final En stripe. The number of cells that make up this measure was also recorded.  
600 We refer to this measure as the length of the newly formed Engrailed stripe.
- 601 • Growth Zone Width “B” (GZ Width B/cells): This measure extends from the one lateral edge of the  
602 posterior growth zone to the other, along the boundary of the growth zone and telson. The  
603 number of cells that make up this measure was also recorded.
- 604 • Growth Zone Area (GZ Area): This is a roughly trapezoidal measure formed by the two lateral  
605 margins of the growth zone and growth zone widths A&B.
- 606 • Length Between Two Final En Stripes (Last Seg Length/cells): This is a measurement along the  
607 midline of the distance between but not including the final two En stripes. The number of cells that  
608 make up this measure was also recorded.
- 609 • Last Segment Area (Last Seg Area): This is a measure of the total area of the last segment  
610 formed at any specific stage. It is a roughly rectangular measure bounded by the two lateral  
611 margins of the segment, growth zone width A and a line just posterior to the penultimate En  
612 stripe.
- 613 • Trunk Area: This is a measure of the total area of the larval trunk. The measurement includes the  
614 lateral edges of all segments and follows the growth zone width B measurement at the posterior.  
615 The final portion of the measure is along the second maxillary En stripe, but not inclusive of that  
616 stripe. It measures just posterior to the second maxillary En stripe but include the entire area of  
617 the first segment.
- 618 • Number of Mitotic Cells in Growth Zone: This is a measurement of the number of cells in the  
619 ventral epidermis posterior to the last Engrailed stripe undergoing mitosis as visualized by  
620 Hoechst 33342 (Thermofisher) or pH3 staining.
- 621 • Length and width measures made by cell counts were used to calculate an estimate for the area  
622 of the growth zone in cell numbers (using the formula  $GZ\ length \times ((GZ\ width\ A + GZ\ width\ B) / 2)$ )  
623 as well as cell field area of the last added segment (last segment length  $\times$  GZ width A). These  
624 were used to estimate the number of cell divisions necessary to add all new segments from the  
625 initial GZ cell field.

626 **Statistics**

627 All scatter plots with lines represent linear regressions of the data; all multiple comparisons are  
628 done by analysis of variance and show averages with standard deviation. Statistical analyses were  
629 performed using GraphPad Prism 7 software or custom R (3.4.0) code. Principal component analysis was  
630 conducted with a custom script in R using the 'prcomp' function and visualized using the 'ggbiplot'  
631 package (Vu, 2011) . PCA utilized 9 different morphometric measurements (all measures excluding cell  
632 counts as outlined in *Growth Zone Dimensions* but also excluding number of mitotic cells) from 423  
633 individuals that were standardized and compared by axial position (tagma). Axial positions were split into  
634 four groups for statistical analysis, an individual "tagma designation" was defined by the position along the  
635 body axis of the last added Engrailed stripe: Engrailed stripes 3-6 = thoracic pre-molt; 7-11= thoracic  
636 post-molt; 12-13 = genital; 14-17 = abdominal.

637 The following R packages were utilized during data analysis, exploratory data analysis, and  
638 visualization; 'graphics', 'devtools' (Wickham and Chang, 2016), 'gridExtra' (Auguie, 2016), 'data.table'  
639 (Dowle and Srinivasan, 2017), 'Hmisc' (Harrell, 2016), 'extrafont' (Chang, 2014), 'broom' (Robinson,  
640 2017), 'ggplot2' (Wickham, 2009), 'ggsignif' (Ahlmann-Eltze, 2017), and 'cowplot' (Wilke, 2017). All  
641 custom R codes and data are available at <https://github.com/savvasjconstantinou/tRinityanalysis>.

642

#### 643 **Acknowledgments**

644 Supported by NSF-IOS 1024220 and 1322350 to T. Williams; NSF-IOS 1024446 and 1322298 to L.  
645 Nagy; BSF 2012763 to A. Chipman. Thanks to M. Shankland in whose lab T. Williams first visualized S-  
646 phase in fairy shrimp many years ago. Thanks to Dr. Christie Bahlai, Dr. William Pitchers, and Colin Diesh  
647 for help with R code, data manipulation, and statistics.

648

#### 649 **Competing interests**

650 The authors declare no competing or financial interests.

651

#### 652 **References**

653 **Ahlmann-Eltze, C.** (2017). Significance Brackets for 'ggplot2'. *R package* version 0.4.0. Available at:  
654 <https://cran.r-project.org/web/packages/ggsignif/index.html>.

655

656 **Alwes, F. and Scholtz, G.** (2006). Stages and other aspects of the embryology of the parthenogenetic  
657 Marmorkrebs (*Decapoda, Reptantia, Astacidae*). *Dev. Genes and Evo.* **216**, 169-184.

658

659 **Alvarenga, P., Mourinha, C., Farto, M., Palma, P., Sengo, J., Marie-Christine, M. C. and Cunha-**  
660 **Queda, C.** (2016). Ecotoxicological assessment of the potential impact on soil porewater, surface and  
661 groundwater from the use of organic wastes as soil amendments. *Ecotoxicol. Environ. Saf.* **126**, 102–110.

662

- 663 **Anderson, D. T.** (1967). Larval development and segment formation in the branchiopod crustaceans  
664 *Limnadia stanleyana* King (Conchostraca) and *Artemia salina* (L.) (Anostraca). *Australian Journal of*  
665 *Zoology* **15**, 47-91.
- 666
- 667 **Anderson, D. T.** (1973). *Embryology and Phylogeny in Annelids and Arthropods*. New York, USA  
668 Pergamon Press.
- 669
- 670 **Auguie, B.** (2016). gridExtra: Miscellaneous Functions for "Grid" Graphics. *R package* version 2.2.1.  
671 Available at: <https://CRAN.R-project.org/package=gridExtra>
- 672
- 673 **Auman, T., Vreede, B. M. I., Weiss, A., Hester, S. D., Williams, T. A., Nagy, L. M. and Chipman, A. D.**  
674 (2017). Dynamics of Growth Zone Patterning in the Milkweed Bug *Oncopeltus fasciatus*. *Development*.  
675 **144**, 1896-1905.
- 676
- 677 **Auman, T. and Chipman, A. D.** (2017). The Evolution of Gene Regulatory Networks that Define  
678 Arthropod Body Plans. *Integr Comp Biol.* **57**, 523-532.
- 679
- 680 **Bolognesi, R., Farzana, L., Fischer, T. D., and Brown, S. J.** (2008). Multiple *Wnt* genes are required for  
681 segmentation in the short-germ embryo of *Tribolium castaneum*. *Curr. Biol.* **18**, 1624-1629.
- 682
- 683 **Bouldin, C. M., Snelson, C. D., Farr, G. H. 3rd, and Kimelman, D.** (2014). Restricted expression of  
684 *cdc25a* in the tailbud is essential for formation of the zebrafish posterior body. *Genes Dev.* **28**, 384-95.
- 685
- 686 **Bouldin, C. M. and Kimelman, D.** (2014). Dual Fucci: A new transgenic line for studying the cell cycle  
687 from embryos to adults. *Zebrafish.* **11**, 182-183.
- 688
- 689 **Boxshall, G.** (2013). Arthropod Limbs and their Development. In *Arthropod Biology and Evolution:*  
690 *Molecules, Development, Morphology* (ed. Minelli, A., Boxshall, G., and Fusco, G.), pp. 241–267.  
691 Heidelberg (Germany) and New York: Springer.
- 692
- 693 **Chang, W.** (2014). Extrafont: tools for using fonts. *R package* version 0.17. Available at: [https://cran.r-](https://cran.r-project.org/web/packages/extrafont/index.html)  
694 [project.org/web/packages/extrafont/index.html](https://cran.r-project.org/web/packages/extrafont/index.html).
- 695
- 696 **Chesebro, J. E., Pueyo, J. I. and Couso, J. P.** (2013). Interplay between a Wnt-dependent organiser  
697 and the Notch segmentation clock regulates posterior development in *Periplaneta americana*. *Biol. Open.*  
698 **2**, 227–237.
- 699

- 700 **Chipman, A.** (2008). Thoughts and speculations on the ancestral arthropod segmentation pathway. In  
701 *Evolving Pathways: Key Themes in Evolutionary Developmental Biology* (ed. Giuseppe Fusco), pp. 342-  
702 356. Cambridge University Press.
- 703
- 704 **Constantinou, S. J., Williams, T. A., Pace, R. M., Stangl, A. J. and Nagy, L. M.** (2016). *Wnt* repertoire  
705 and developmental expression patterns in the crustacean *Thamnocephalus platyurus*. *Evol. Dev.* **18**,  
706 324–341.
- 707
- 708 **Copf, T., Schröder, R. and Averof, M.** (2004). Ancestral role of *caudal* genes in axis elongation and  
709 segmentation. *Proc. Natl. Acad. Sci. U.S.A.* **101**, 17711–17715.
- 710
- 711 **da Silva, S. M. and Vincent, J. P.** (2007). Oriented cell divisions in the extending germband of  
712 *Drosophila*. *Development.* **134**, 3049-3054.
- 713
- 714 **Davis, G. K. and Patel, N. H.** (2002). Short, long, and beyond: molecular and embryological approaches  
715 to insect segmentation. *Annu Rev Entomol.* **47**, 669–699.
- 716
- 717 **Dohle, W., Gerberding, M., Hejnol, A. and Scholtz, G.** (2004). Cell lineage, segment differentiation, and  
718 gene expression in crustaceans. In *Evolutionary Developmental Biology of Crustacea* (ed. G. Scholtz),  
719 pp. 95-133. Lisse, Abingdon, Exton (PA), Tokyo: A.A. Balkema.
- 720
- 721 **Dowle, M. and Srinivasan, A.** (2017). data.table: Extension of `data.frame`. *R package* version 1.10.4.  
722 Available at: <https://CRAN.R-project.org/package=data.table>.
- 723
- 724 **Edgar, B. A. and O'Farrell, P. H.** (1990). The Three Postblastoderm Cell Cycles of *Drosophila*  
725 Embryogenesis Are Regulated in G2 by *string*. *Cell.* **62**, 469–480.
- 726
- 727 **Edgar, B. A., Lehman, D. A. and O'Farrell, P. H.** (1994). Transcriptional regulation of *string (cdc25)*: a  
728 link between developmental programming and the cell cycle. *Development.* **120**, 3131-3143.
- 729
- 730 **EI-Sherif, E., Zhu, X., Fu, J. and Brown, S. J.** (2014). *Caudal* Regulates the Spatiotemporal Dynamics  
730 of Pair-Rule Waves in *Tribolium*. *PLOS Genet.* **10**(10), e1004677
- 731
- 732 **Foe, V. E.** (1989). Mitotic domains reveal early commitment of cells in *Drosophila* embryos. *Development.*  
733 **107**, 1–22.



- 734 **Foe V. E., Odell, G. and Edgar B. A.** (1993). Mitosis and morphogenesis in the *Drosophila* embryo: point  
735 and counterpoint. In *The Development of Drosophila melanogaster* (ed. Bate, M. and Martinez-Arias, A.),  
736 pp. 149-300. Cold Spring Harbor, New York: Cold Spring Harbor Laboratory Press.  
737
- 738 **Freeman, J. A.** (1986). Epidermal Cell Proliferation during Thoracic Development In Larvae of *Artemia*. *J.*  
739 *Crust. Biol.* **6**, 37-48.  
740
- 741 **Freeman, J. A., Cheshire, L. B., and Macrae, T. H.** (1992). Epithelial Morphogenesis in Developing  
742 *Artemia* - the Role of Cell Replication, Cell-Shape Change, and the Cytoskeleton. *Dev. Biol.* **152**, 279-  
743 292.
- 744 **Fryer, G.** (1983). Functional ontogenetic changes in *Branchinecta ferox* (Milne-Edwards) (Crustacea:  
745 Anostraca) *Phil. Trans. R. Soc. Lond. B* **303**, 229-343.  
746
- 747 **Giet, R. and Glover, D.M.** (2001). *Drosophila* aurora B kinase is required for histone H3 phosphorylation  
748 and condensin recruitment during chromosome condensation and to organize the central spindle during  
749 cytokinesis. *J. Cell Biol.* **152**, 669–681.  
750
- 751 **Handel, K., Basal, A., Fan, X. and Roth, S.** (2005). *Tribolium castaneum twist*: gastrulation and  
752 mesoderm formation in a short-germ beetle. *Dev. Genes Evol.* **215**,13-31.  
753
- 754 **Hans, F. and Dimitrov, S.** (2001). Histone H3 phosphorylation and cell division. *Oncogene* **20**, 3021-  
755 3027.  
756
- 757 **Harrell, F. E. Jr., with contributions from Charles Dupont and many others.** (2016). Hmisc: Harrell  
758 Miscellaneous. *R package* version 4.0-2. Available at: <https://CRAN.R-project.org/package=Hmisc>  
759
- 760 **Hayden, L. and Arthur, W.** (2014). The centipede *Strigamia maritima* possesses a large complement of  
761 *Wnt* genes with diverse expression patterns. *Evol. Dev.* **16**, 127–138.  
762
- 763 **Hayden, L., Schlosser, G. and Arthur, W.** (2015). Functional analysis of centipede development  
764 supports roles for *Wnt* genes in posterior development and segment generation. *Evo. Dev.* **17**, 49-62.  
765
- 766 **Henzel, M. J., Wei, Y., Mancini, M. A., Hooser, A. V., Ranalli, T., Brinkley, B. R., Bazett-Jones, D.**  
767 **P. and Allis, C.D.** (1997). Mitosis-specific phosphorylation of histone H3 initiates primarily within  
768 pericentromeric heterochromatin during G2 and spreads in an ordered fashion coincident with mitotic  
769 chromosome condensation. *Chromosoma.* **106**, 348-360.  
770

- 771 **Hogvall, M., Schönauer, A., Budd, G., McGregor, A., Posnien, N. and Janssen, R.** (2014). Analysis of  
772 the *Wnt* gene repertoire in an onychophoran provides new insights into the evolution of segmentation.  
773 *EvoDevo*. **5**,14.  
774
- 775 **Kenneth, D. and Wieschaus, E.** (1994). Cell intercalation during *Drosophila* germband extension and its  
776 regulation by pair-rule segmentation genes. *Development* **120**, 827-841.  
777
- 778 **Janssen, R., Prpic, N. M. and Damen, W. G. M.** (2004). Gene expression suggests decoupled dorsal  
779 and ventral segmentation in the millipede *Glomeris marginata* (Myriapoda: Diplopoda). *Dev. Biol.* **268**,  
780 89–104.  
781
- 782 **Janssen, R., Le Gouar, M., Pechmann, M., Poulin, F., Bolognesi, R., Schwager, E., Hopfen, C.,  
783 Colbourne, J., Budd, G. and Brown, S.** (2010). Conservation, loss, and redeployment of Wnt ligands in  
784 protostomes: implications for understanding the evolution of segment formation. *BMC Evol. Biol.* **10**, 374.  
785
- 786 **Jurberg, A. D., Aires, R., Varela-Lasheras, I., Novoa, A. and Mallo, M.** (2013). Switching axial  
787 progenitors from producing trunk to tail tissues in vertebrate embryos. *Dev. Cell* **25**, 451–462.  
788
- 789 **Keller, R.** (2006). Mechanisms of elongation in embryogenesis. *Development*. **133**, 2291-2302.  
790
- 791 **Lawrence, P. A.** (1992). *The Making of a Fly: The Genetics of Animal Design*. Oxford, UK: Blackwell  
792 Scientific Publications.  
793
- 794 **Le, L.T., Vu, H.L., Nguyen, C.H., Molla, A.** (2013). Basal aurora kinase B activity is sufficient for histone  
795 H3 phosphorylation in prophase. *Biol. Open*. **2**, 379-86.  
796
- 797 **Lehman, D. A., Patterson, B., Johnston, L. A., Balzer, T., Britton, J. S., Saint, R. and Edgar, B. A.**  
798 (1999). Cis-regulatory elements of the mitotic regulator, *string/Cdc25*. *Development*. **126**, 1793–1803.  
799
- 800 **Linder, F.** (1941). Contributions to the morphology and the taxonomy of the Branchiopoda Anostraca.  
801 *Zool. Bidrag Fran Uppsala* **20**, 102–303.  
802
- 803 **Liu, P. Z. and Kaufman, T. C.** (2005). Short and long germ segmentation: unanswered questions in the  
804 evolution of a developmental mode. *Evol Dev*. **7**, 629–646.  
805
- 806 **Liu, P. Z. and Kaufman, T.C.** (2009). Morphology and husbandry of the large milkweed bug, *Oncopeltus*  
807 *fasciatus*. *Cold Spring Harb. Protoc.* 2009: pdb.emo127.

- 808 **McGregor, A. P., Hilbrant, M., Pechmann, M., Schwager, E. E., Prpic, N. M. and Damen, W. G. M.**  
809 (2008). *Cupiennius salei* and *Achaearanea tepidariorum*: Spider models for investigating evolution and  
810 development. *Bioessays*. **30**, 487–498.
- 811
- 812 **McGregor, A. P., Pechmann, M., Schwager, E. E. and Damen, W. G. M.**, (2009). An ancestral  
813 regulatory network for posterior development in arthropods. *Commun. Integr. Biol.* **2**, 174-176.
- 814
- 815 **McPherron, A.C., Lawler, A.M., and Lee, S.J.** (1999). Regulation of anterior/posterior patterning of the  
816 axial skeleton by growth/differentiation factor 11. *Nat. Genet.* **22**, 260–264.
- 817
- 818 **Mito, T., Shinmyo, Y., Kurita, K., Nakamura, T., Ohuchi, H. and Noji, S.** (2011). Ancestral functions of  
819 Delta/Notch signaling in the formation of body and leg segments in the cricket *Gryllus bimaculatus*.  
820 *Development*. **138**, 3823-3833.
- 821
- 822 **Møller, O. S., Olesen, J. and Høeg, J. T.** (2004). On the larval development of *Eubbranchipus grubii*  
823 (Crustacea, Branchiopoda, Anostraca), with notes on the basal phylogeny of the Branchiopoda.  
824 *Zoomorphology* **123**, 107-123.
- 825
- 826 **Murat, S., Hopfen, C. and McGregor, A. P.** (2010). The function and evolution of *Wnt* genes in  
827 arthropods. *Arthropod Struct. Dev.* **39**, 446–452
- 828
- 829 **Nagy, L.M., Kiguchi, K. and Riddiford, L.** (1994). Morphogenesis in the early embryo of the  
830 lepidopteran *Bombyx mori*. *Dev. Biol.* **185**, 137-151.
- 831
- 832 **Nakamoto, A., Hester, S. D., Constantinou, S. J., Blaine, W. G., Tewksbury, A. B., Matei, M. T.,**  
833 **Nagy, L. M. and Williams, T. A.** (2015). Changing cell behaviors during beetle embryogenesis correlates  
834 with slowing of segmentation. *Nature Communications*. **6**:6635.
- 835
- 836 **Pueyo, J. I., Lanfear, R. and Couso, J. P.** (2008). Ancestral Notch-mediated segmentation revealed in  
837 the cockroach *Periplaneta americana*. *PNAS*. **105**, 16614-16619.
- 838
- 839 **Robinson, D.** (2017). Convert Statistical Analysis Objects into Tidy Data Frames. *R package broom*  
840 version 0.4.2. Available at: <https://cran.r-project.org/web/packages/broom/index.html>
- 841
- 842 **Rogers, D. C.** (2009). Branchiopoda (Anostraca, Notostraca, Laevicaudata, Spinicaudata, and  
843 Cyclestherida). In *Encyclopedia of Inland Waters* (ed. Likens, G. F.), Vol. 2 (pp. 242-249) Elsevier,  
844 Oxford.

845  
846 **Rosenberg, M. I., Brent, A. E., Payre, F. and Desplan, C.** (2014). Deal mode of embryonic development  
847 is highlighted by expression and function of nasonia pair-rule genes. *Elife*. 3:e01440.  
848  
849 **Sander, K.** (1976). Specification of the basic body pattern in insect embryogenesis. *Adv. Insect Physiol.*  
850 **12**, 125 -238.  
851  
852 **Scholtz, G.** (1993). Teloblasts in decapod embryos: an embryonic character reveals the monophyletic  
853 origin of freshwater crayfishes (Crustacea, Decapoda). *Zool Anz.* **230**, 45–54.  
854  
855 **Scholtz, G. and Dohle, W.** (1996). Cell lineage and cell fate in crustacean embryos - A comparative  
856 approach. *Int. J. Dev. Biol.* **40**, 211-220.  
857  
858 **Schröter, C., Herrgen, L., Cardona, A., Brouhard, G. J., Feldman, B. and Oates, A. C.** (2008).  
859 Dynamics of zebrafish somitogenesis. *Dev. Dyn.* **237**, 545–553.  
860  
861 **Shinmyo, Y., Mito, T., Matsushita, T., Sarashina, I., Miyawaki, K., Ohuchi, H. and Noji, S.** (2005).  
862 *caudal* is required for gnathal and thoracic patterning and for posterior elongation in the intermediate-  
863 germband cricket *Gryllus bimaculatus*. *Mech. Dev.* **122**, 231-239.  
864  
865 **Snodgrass, R. E.** (1938). Evolution of the Annelida, Onychophora, and Arthropoda. *Smithsonian*  
866 *Miscellaneous Collections* **97**, 1-159.  
867  
868 **Stollewerk, A., Schoppmeier, M. and Damen, W. G.** (2003). Involvement of *Notch* and *Delta* genes in  
869 spider segmentation. *Nature.* **423**, 863-865.  
870  
871 **Tautz, D., Friedrich, M. and Schröder, R.** (1994). Insect embryogenesis – what is ancestral and what is  
872 derived? *Development* **1994 Supplement**, 193-199.  
873  
874 **Vu. Q. V.** (2011). ggbiplot: A ggplot2 based biplot. *R package* version 0.55. Available at:  
875 <http://github.com/vqv/ggbiplot>  
876  
877 **Weisz, P.** (1946). The Space-Time Pattern of Segment Formation in *Artemia salina*. *Biol. Bull.* **91**,  
878 119-140.  
879  
880 **Wickham, H.** (2009). *ggplot2: Elegant Graphics for Data Analysis*. New York: Springer-Verlag.  
881

- 882 **Wickham, H. and Chang, W.** (2016). devtools: Tools to Make Developing R Packages Easier. *R*  
883 *package* version 1.12.0. Available at: <https://CRAN.R-project.org/package=devtools>  
884
- 885 **Wilke, C.** (2017). Streamlined Plot Theme and Plot Annotations for 'ggplot2'. *R package cowplot* version  
886 0.8.0. Available at: <https://cran.r-project.org/web/packages/cowplot/index.html>  
887
- 888 **Williams, T. A.** (1999). Morphogenesis and Homology in Arthropod Limbs. *Amer. Zool.* **39**, 664-675.  
889
- 890 **Williams, T. A., Nulsen, C. and Nagy, L. M.** (2002). A Complex Role for *Distal-less* in Crustacean  
891 Appendage Development. *Dev. Biol.* **241**, 302-312  
892
- 893 **Williams, T. A.** (2007). Limb morphogenesis in the branchiopod crustacean, *Thamnocephalus platyurus*,  
894 and the evolution of proximal limb lobes within Anostraca. *J. Zoolog. Syst. Evol. Res.* **45**, 191-201.  
895
- 896 **Williams, T. A., Blachuta, B., Hegna, T. A. and Nagy, L. M.** (2012). Decoupling elongation and  
897 segmentation: *Notch* involvement in anostracan crustacean segmentation. *Evol. Dev.* **14**, 372-382.  
898
- 899 **Williams, T. A. and Nagy, L. M.** (2017). Linking gene regulation to cell behaviors in the posterior growth  
900 zone of sequentially segmenting arthropods. *Arthropod Struct Dev.* **46**, 380-394.  
901
- 902 **Wilson, V., Olivera-Martinez, I. and Storey, K. G.** (2009). Stem cells, signals and vertebrate body axis  
903 extension. *Development* **136**, 1591–1604.  
904
- 905 **Winston, C.** (2014). extrafont: Tools for using fonts. *R package* version 0.17. Available at:  
906 <https://CRAN.R-project.org/package=extrafont>  
907
- 908 **Wolff, C.** (2009). The embryonic development of the malacostracan crustacean *Porcellio scaber*  
909 (Isopoda, Oniscidea). *Dev Genes Evol.* **219**, 545-564.  
910

### 911 **Figure and Table Legends-**

912 Figure 1. ***Thamnocephalus platyurus* development and morphometric measures.** A-C. Engrailed  
913 protein staining in three different stages of development: A. three En stripes, B. six En stripes, and C.  
914 eight En stripes. Note that the asterisks mark the first thoracic segment in each larva and in (C) show the  
915 outpocketing of the segmental limb bud form the body wall. In B. and C. scanning electron micrographs  
916 of similarly aged larvae show overall morphology. D. *Thamnocephalus* larva with five En stripes, depicting  
917 measurements used in this study (defined in methods). Engrailed expression (red) is depicted against cell  
918 nuclei (blue-Hoechst). 1- body length, 2- growth zone length, 3- growth zone width “A” (width of newly  
919 added Engrailed stripe), 4- growth zone width “B”, 5- trunk area, 6-last segment area, 7- growth zone

920 area, 8- last segment length. Note, the area measures are in color; length measures are given in white  
921 and denoted with an arrowhead. Scale bar = 100  $\mu$ m. All larvae are shown with anterior to the left, ventral  
922 side up.

923

924 Figure 2. **Elongation of the body at successive developmental stages in *Thamnocephalus*.** A. Body  
925 length plotted against development stage. The animals roughly double in length as the body segments  
926 are specified. B. Percent change in body length plotted against developmental stage, demonstrating the  
927 impact of the first molt on change in body length. C. Increase in overall area of the trunk during larval  
928 development; like the body length, this increases at each stage (after four Engrailed stripes added.) The  
929 black bars represent the thoracic segments added before the first molt (dashed line), subsequent thoracic  
930 segments are grey. Genital segments (modified abdominal segments 1&2) are marked by solid lines and  
931 are followed by additional abdominal segments.

932

933 Figure 3. **Change in growth zone dimensions in growing *Thamnocephalus* (A, B, D-H) and *Artemia***  
934 **(C) larvae.** A. Length of the growth zone at successive developmental stages in *Thamnocephalus* shows  
935 the growth zone shortens over time except when it lengthens after the first molt. This trend is the same  
936 when measured by counting cells (B) but indicates how few cells are in the growth zone, especially at  
937 later stages. C. In contrast to *Thamnocephalus*, the length of the growth zone at successive  
938 developmental stages in *Artemia* shows the growth zone length does not vary much over time. D. In  
939 *Thamnocephalus*, the area of the growth zone decreases, except after the first molt. E. The newest  
940 segments are greatest in length during early stages. F. When measured by counting cells, the length of  
941 the newest segment added mimics the linear dimension in (E) but shows how few cells make up each  
942 new segment anlage, especially at later larval stages. G. The area of the last added segment decreases  
943 over development in *Thamnocephalus*. H. Unlike other dimensions, the width of *Thamnocephalus* larvae  
944 where the newly specified Engrailed stripe forms remains relatively constant during development (growth  
945 zone width "A" measure). The black bars represent the thoracic segments added before the first molt  
946 (dashed line), subsequent thoracic segments are grey. Genital segments (modified abdominal segments  
947 1&2) are marked by solid lines and are followed by additional abdominal segments.

948

949 Figure 4. **Principal Component Analysis biplot.** 423 individuals are plotted along PC1 and PC2 and  
950 colored by tagma (the tagma of the last segment formed). PC1 separates individuals by tagma with each  
951 tagma group being significantly different from one another. In addition, thoracic pre- and post-molt  
952 segments form clusters that are significantly different from all other tagma (Type II MANOVA;  
953  $F_{9,1272}=103.06$ ,  $p<0.001$ ).

954

955 Figure 5. **Direct measures of mitosis in the growth zone of *Thamnocephalus*.** A. Scoring pH3-  
956 positive cells in the growth zone captures consistently higher numbers of cells in M phase compared to



957 cells measured with nuclear staining (Hoechst). Mitosis rates are highest just after hatching and increase  
958 prior to the first molt (dotted line). B. Regardless of developmental stage, ~80% of the actively dividing  
959 cells in the growth zone, as measured with nuclear staining, are oriented along the AP body axis. C. Total  
960 calculated number of cells in the growth zone compared to average number in mitosis at successive  
961 developmental stages. D. Representative photo of AP oriented cells in the GZ (arrow). Note the medial-  
962 lateral oriented cells in the developing segments (arrowhead). Scale bar equals 100  $\mu$ m.

963

964 **Figure 6. A distinct domain of cells synchronized in S phase appears in the last added segment**  
965 **while the anterior growth zone lacks EdU incorporating cells.** A, B. After 30 minutes of exposure to  
966 EdU (green), a band of cells in S phase is visible in the last added segment (red arrows indicate last two  
967 En stripes) in *Thamnocephalus*. This pattern is maintained throughout the early stages as seen in  
968 representative 1 hour (A) and 2 hour (B) larvae. The band lies almost entirely within the last segment after  
969 En segment specification. C, D. In both 1 hour (C) and 2 hour (D) larvae, cells in the last added segment  
970 (EdU band, light green) do not show pH3 staining (pink) indicative of M-phase. Scale bars equal 100 $\mu$ m.

971

972 **Figure 7. EdU incorporation in anterior segments shows stereotyped progression in**  
973 ***Thamnocephalus* larvae.**

974 A. Representative larvae with three to seven segments, oriented anterior left; the trunk is everything  
975 posterior (right) of the gray circle (which covers the head segments for clarity). B. Diagrammatic  
976 representation of animals with three to seven segments highlighting the progression of EdU incorporation  
977 in the trunk of *Thamnocephalus*. A, B. In each stage, the first thoracic segment is denoted by the red  
978 arrowhead and the EdU band is indicated with a green asterisk. The anterior growth zone is devoid of  
979 EdU, while the posterior growth zone has variable numbers of cells incorporating EdU. In the last added  
980 segment, all cells incorporate EdU, forming a band of EdU that sometimes extends into the lateral edges  
981 of the penultimate segment. The two segments anterior to this are devoid of EdU. Anterior still, segments  
982 begin to progress through S-phase, beginning as a discretely aligned row of cells at the apical ridge of the  
983 segment that then expands throughout the segment. C, D. Higher magnification of a series of hemi-  
984 segments to illustrate progression of EdU incorporation in the trunk. Thoracic segments are indicated by  
985 number and the EdU incorporating cells aligned along the apical ridge are indicated (arrowhead). The  
986 neuroectoderm cycles through S phase a few segments anterior to the EdU band (asterisk). Both a  
987 specimen (top) and corresponding diagrammatic representation (bottom) are given.

988

989 **Figure 8. Caudal and Wnt gene expression maps directly to boundaries of EdU domains.** A-E.  
990 Posterior of larvae showing both *in situ* expression domains and EdU incorporation. In each case, anterior  
991 is left and the posterior edge of the EdU band is denoted by a red arrowhead. A. *Cad* expression extends  
992 throughout the entire growth zone and borders the telson, overlapping the posterior *Wnt4* and *WntA*  
993 expression. B. Posterior *WntA* expression is mainly in the anterior growth zone, where there are no EdU

994 (or very few) positive cells. The anterior border of *cad* (A) and *WntA* (B) both flank the posterior edge of  
995 the synchronized EdU band in the newest specified segment. C. Posterior *Wnt4* expression excludes the  
996 band with rare EdU staining and overlaps with the unsynchronized EdU region in the posterior growth  
997 zone. *Wnt4* also appears to have a concentration gradient from posterior border towards anterior border.  
998 The anterior border of *Wnt4* expression meets the posterior border of *WntA* expression. D. *Wnt6* is  
999 expressed in the telson and (E) in the cells that form the apical ridge of the limb buds, which also show  
1000 EdU expression (white arrows).

1001  
1002 **Figure 9. Diagram of growth zone in *Thamnocephalus*.** The *Thamnocephalus* growth zone is divided  
1003 into anterior and posterior regions based on cell behaviors and gene expression. The posterior domain  
1004 corresponds to *Wnt4* expression (indicated by blue gradient); cell cycling in this region is present but low.  
1005 Although mitosis in the posterior growth zone is not temporally or spatially synchronized, all mitosis in this  
1006 domain is restricted in anterior-posterior orientation. The anterior growth zone corresponds to *WntA*  
1007 expression (indicated by red gradient) and lacks cells in S phase. Cells in this region are possibly  
1008 arrested either in early S phase or at the entry from G1 to S phase, since immediately after the anterior  
1009 growth zone cells enter S phase again in the newest specified segment (dark green in last added  
1010 segment). The synchronized S phase and subsequent mitoses in the segments generate the bulk of the  
1011 visible elongation of the larvae. *Wnt6* expression (dark blue bar) is in the telson, posterior to the growth  
1012 zone while *caudal* expression (yellow bar) is throughout the growth zone. S phase domains delineated in  
1013 green, *Engrailed* expressing cells delineated in red.

1014 **Figures and Tables:**

1015 **Figure 1.**

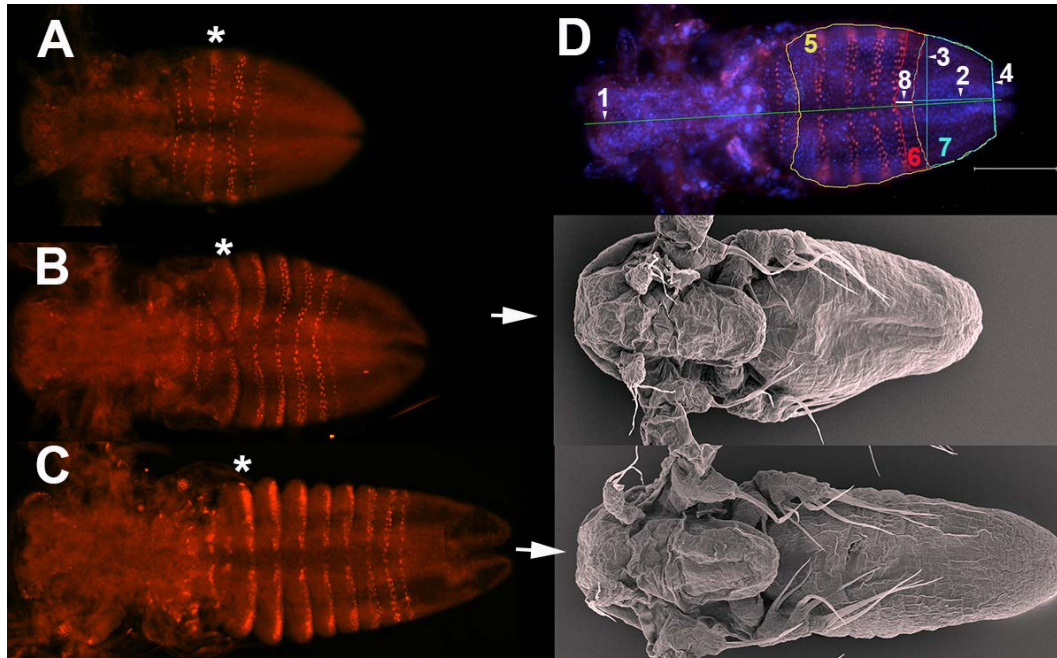

1016

1017 **Figure 2.**

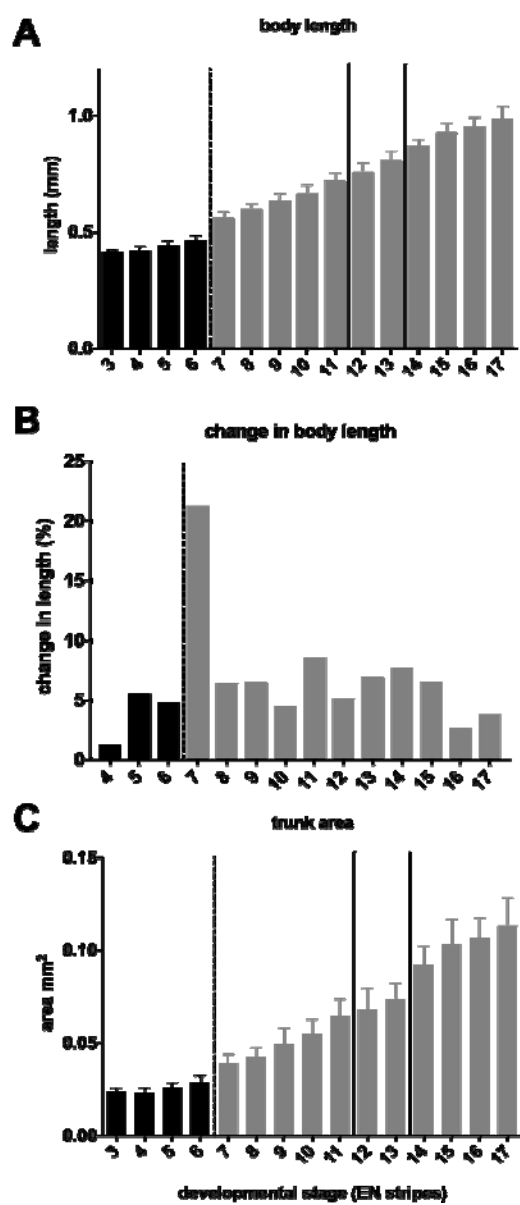

1018

1019 Figure 3.

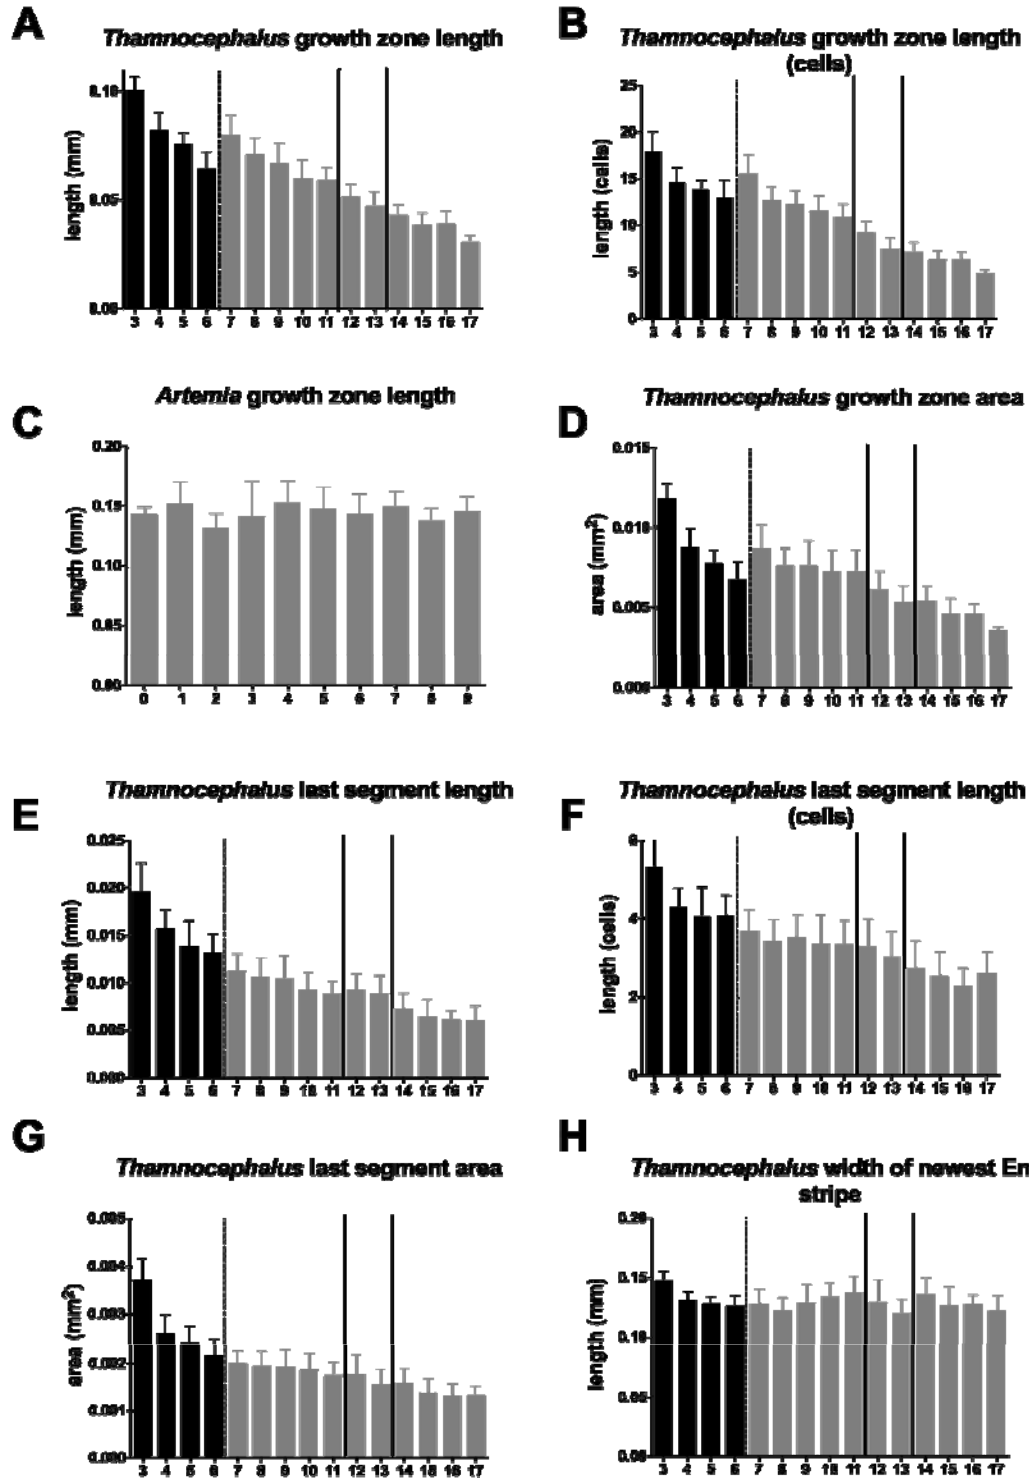

1020  
1021  
1022

1023  
1024  
1025

**Figure 4.**

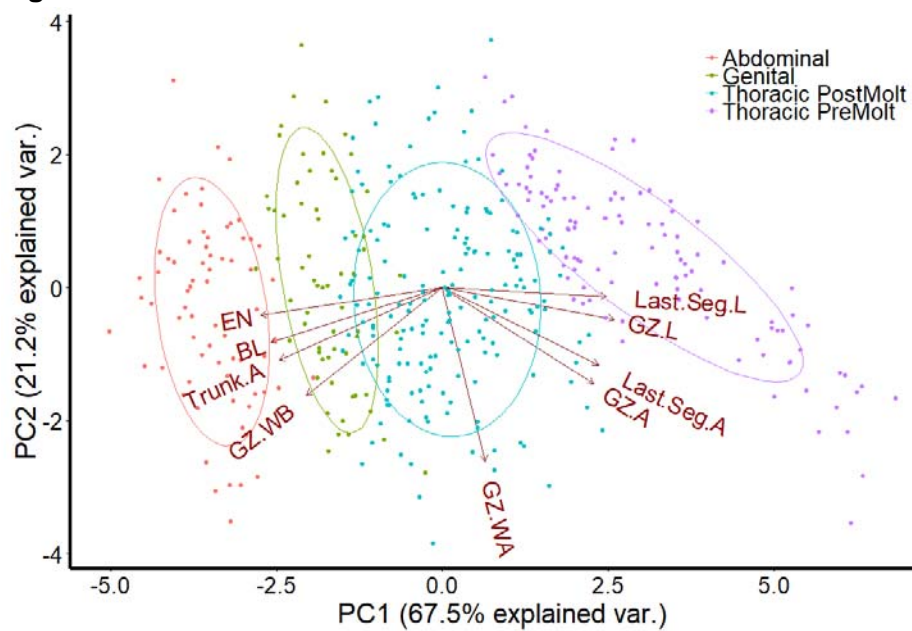

1026  
1027  
1028  
1029  
1030  
1031  
1032  
1033  
1034  
1035  
1036  
1037



1038 **Figure 5.**

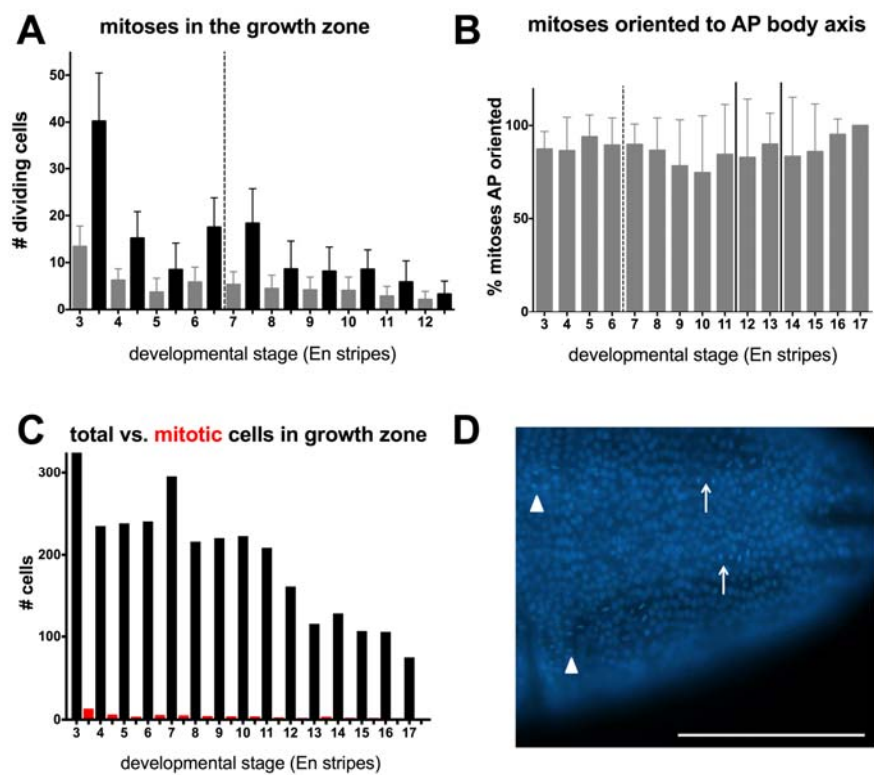

1039

1040

1041

1042

1043 **Figure 6.**  
1044

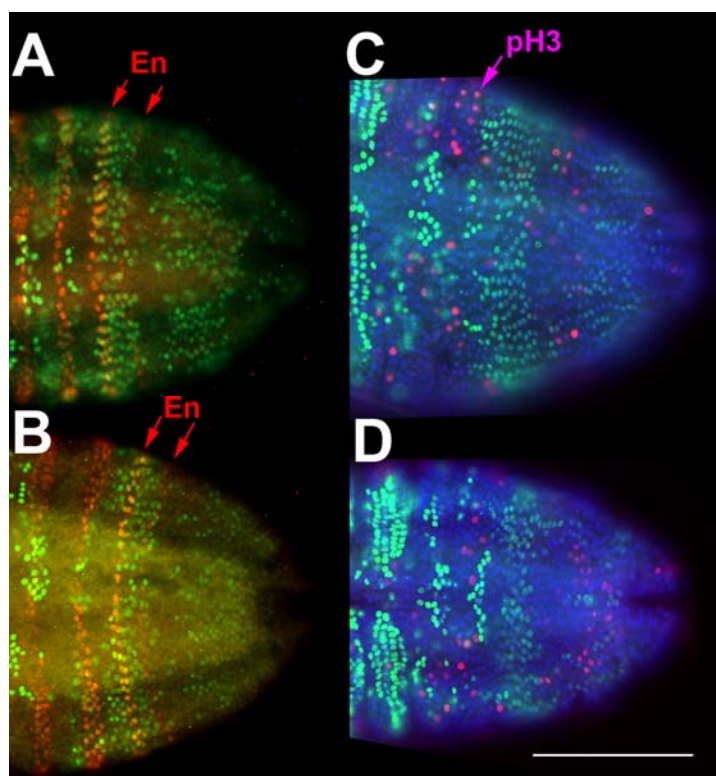

1045  
1046  
1047  
1048  
1049  
1050  
1051

1052 **Figure 7.**

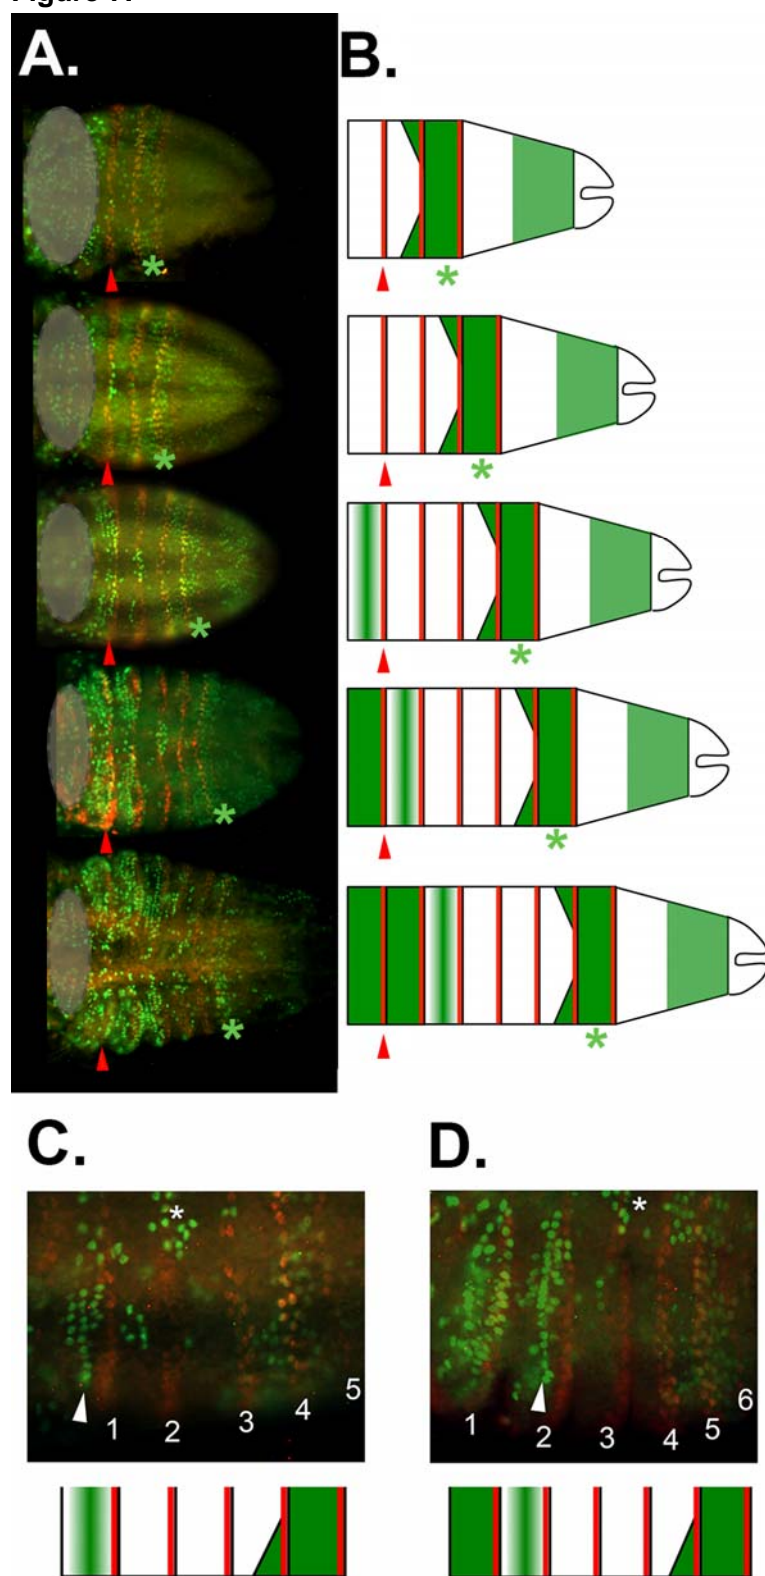

1053  
1054  
1055

1056 **Figure 8.**  
1057

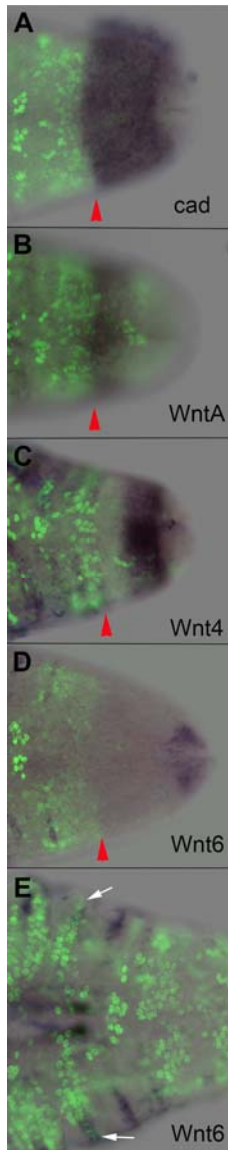

1058  
1059  
1060



1069 **Supplementary data file:**

1070

1071 Supplementary Figure S1. ***Thamnocephalus* adds segments linearly.** Segment number is

1072 plotted against time at one hour intervals and fit with a linear regression. Points are offset to

1073 demonstrate the high number of similar measures; n=20-30 individuals for each time point.

1074 Dotted line represents the first molting event at 4 hours. Solid lines represent the transition

1075 between tagma, thoracic to genital (~12H) and genital to abdominal (~15H).

1076

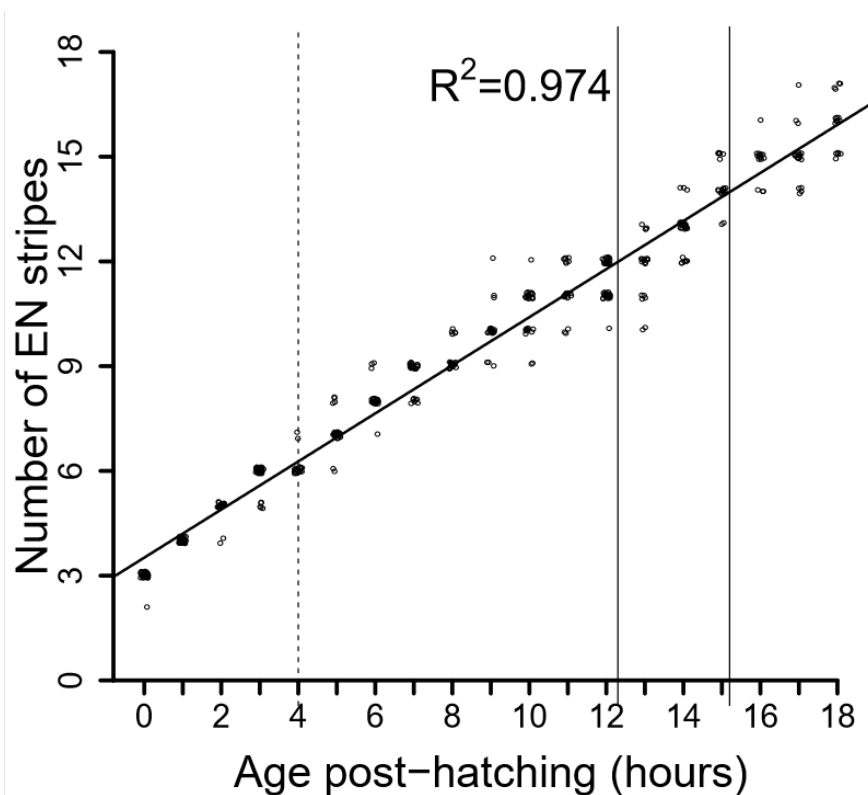

1077

1078

1079

1080

1081

1082

1083

1084



1085 Supplementary Figure S2. **Change in setal morphology that occurs during first molt; used**  
1086 **to score animals pre- and post-molt when not tracked as individuals.** A, B. Premolt larva  
1087 showing the relatively smooth trunk (symbol) and the non-setulated gnathobasic process  
1088 (arrowhead) and xxx spine (asterisk). C, D. Post-molt larva showing overt trunk morphogenesis  
1089 in the anterior segments (symbol) and the setulation of the gnathobasic process (arrowhead)  
1090 and xxx spine (asterisk). Scale bars = 100  $\mu$ m. E. Average (3.7h) and standard deviation of time  
1091 to first molt for a cohort of 46 hatchlings.  
1092

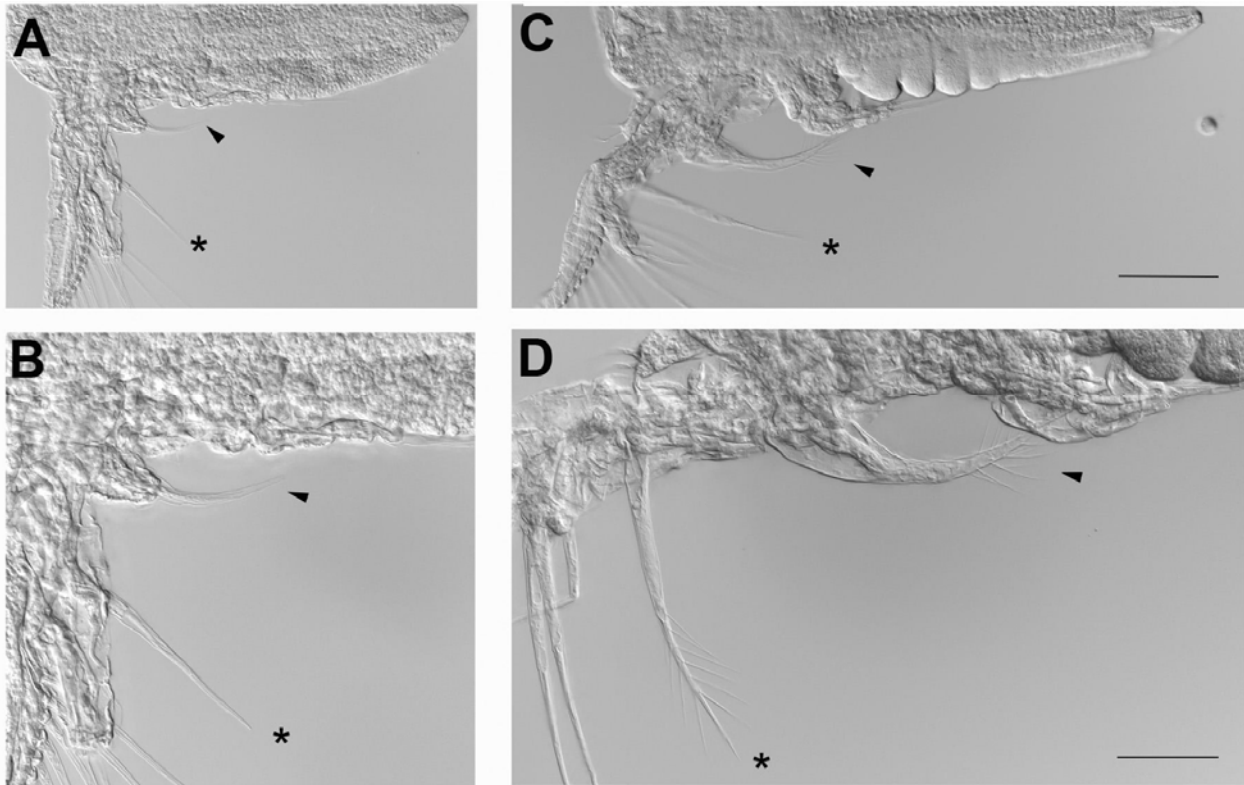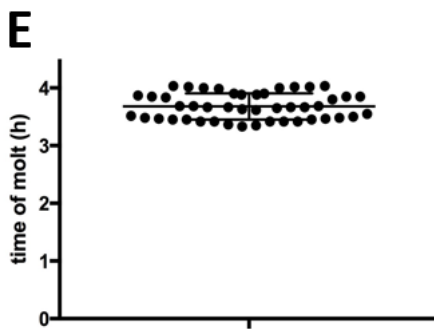

1098 Supplementary Figure S3. **Tagma level differences in *Thamnocephalus* morphometric**  
1099 **measurements.** Tagma level differences (including pre- and post-molt thoracic ‘tagma’  
1100 identified from PCA; see Figure 5) are shown for body length (A), growth zone length (B) and  
1101 area (C), the width of the newly added *en* stripe (D), last segment length (E) and area (F). All  
1102 comparisons are significantly different (Tukey’s HSD;  $p < 0.05$ ) unless otherwise notated with  
1103 “NS.”. The y-axes are measured in mm. Thor Pre= thoracic pre-molt; Thor Post= thoracic post-  
1104 molt. Note- actual pdf is available [here](#)  
1105

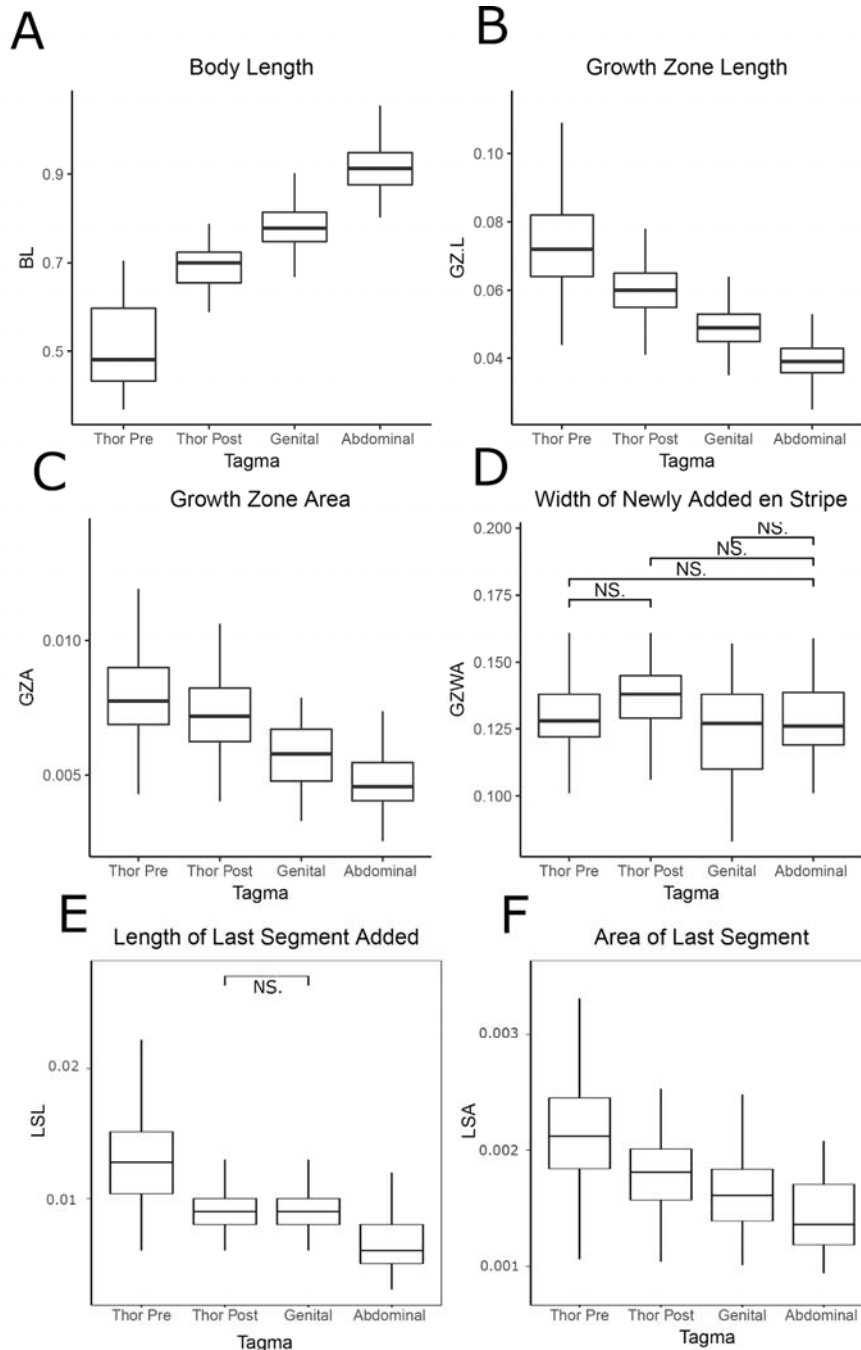

1106 Supplementary Figure S4. **Comparison of tissue needed versus available in the growth**  
1107 **zone to make new segments in a hatching larva.** The average size of the initial growth zone  
1108 upon hatching *versus* the area required to make all additional segments, where the latter is  
1109 calculated based on the sum of each newly added segment over the measured course of  
1110 development. A is based on linear measures, B is based on cell counts.

1111  
1112

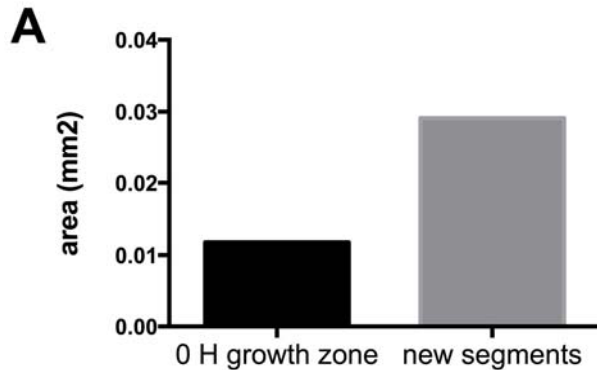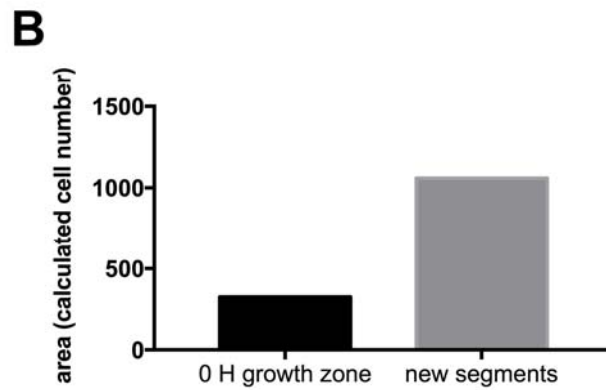

1113  
1114  
1115

1116 Supplementary Figure S5: **Correlation of pH3 and Hoechst mitosis counts and cell cycle**  
1117 **expression.** A. pH3 and Hoechst count correlation for 6 EN animals. We find low correlation at  
1118 all developmental stages. B. Expression of growth zone pH3 and Hoechst in relation to cell  
1119 cycle progression. Although pH3 is reported to be expressed throughout M-phase (red line), we  
1120 find *Thamnocephalus* pH3 to be expressed early in M-phase (red dotted line). By comparison,  
1121 mitosis counts using Hoechst only score cells in late M-phase.

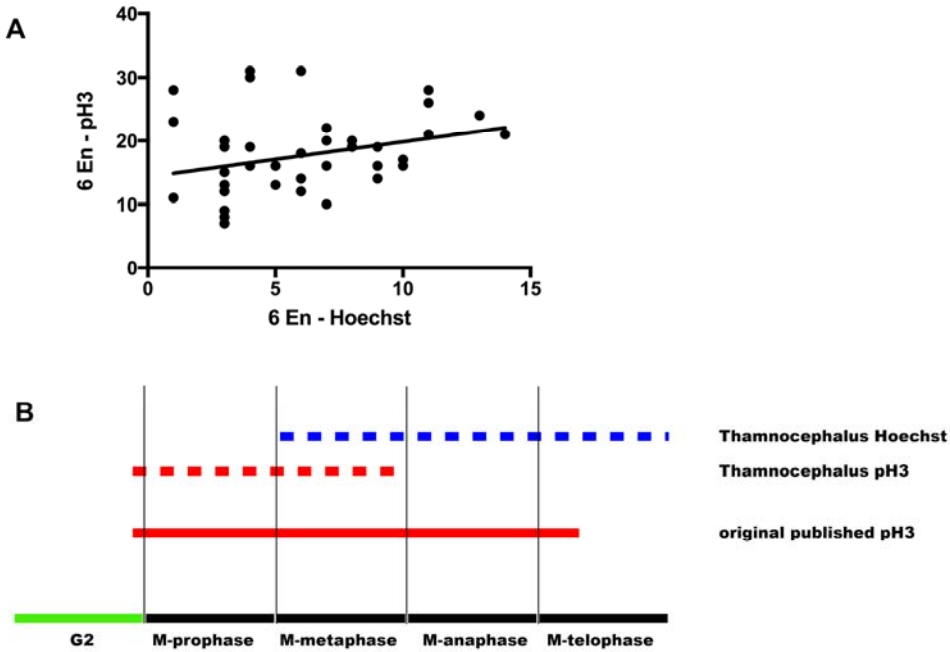

1122  
1123  
1124  
1125

1126 Supplementary Figure S6. **Comparison of dorsal and ventral cell dynamics in**  
1127 ***Thamnocephalus* larvae, visualized by EdU incorporation.** The pattern of Edu and all growth  
1128 zone measures carry around to the dorsal side of the larvae (shown in focus in A). Focusing  
1129 through the same specimen shows the normal pattern we describe in the text (B, cells out of  
1130 focus due to being viewed through dorsal tissue). This corresponding patterning justifies  
1131 restricting our measures and calculations to the ventral surface since we focus on changes in  
1132 dimension and other relative features, not absolute measures.  
1133  
1134

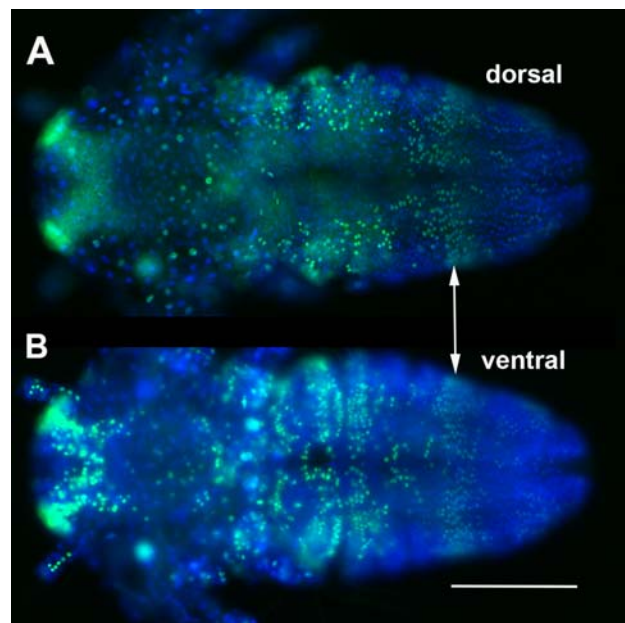

1135  
1136  
1137  
1138

1139 Supplementary Table 1. **Correlation between Hoechst and pH3 mitosis counts within the**  
1140 **same individual.** For all developmental stages that have both Hoechst and pH3 data, the linear  
1141 correlation and number of specimens is given.

1142  
1143

| Developmental stage | R <sup>2</sup> value for linear correlation between mitosis counts from Hoechst figures versus pH3 staining in the same specimens | Number of specimens |
|---------------------|-----------------------------------------------------------------------------------------------------------------------------------|---------------------|
| 3 En                | 0.168                                                                                                                             | 24                  |
| 4 En                | 0.215                                                                                                                             | 25                  |
| 5 En                | 0.656                                                                                                                             | 14                  |
| 6 En                | 0.084                                                                                                                             | 44                  |
| 7 En                | 0.340                                                                                                                             | 24                  |
| 8 En                | 0.063                                                                                                                             | 29                  |
| 9 En                | 0.413                                                                                                                             | 44                  |
| 10 En               | 0.322                                                                                                                             | 34                  |
| 11 En               | 0.429                                                                                                                             | 39                  |
| 12 En               | 0.084                                                                                                                             | 17                  |

1144



- 1145 **Author Contributions**
- 1146
- 1147 Conceptualization: LMN, ADC, TAW
- 1148 Methodology: SJC, TAW
- 1149 Validation: SJC, TAW
- 1150 Formal analysis: ND, SJC, TAW
- 1151 Investigation: ND, SJC
- 1152 Resources: TAW
- 1153 Data curation: SJC, TAW
- 1154 Writing - original draft: SJC, TAW
- 1155 Writing - review & editing: ND, LMN, ADC, SJC, TAW
- 1156 Visualization: ND, SJC, TAW
- 1157 Supervision: TAW
- 1158 Project administration: TAW
- 1159 Funding acquisition: LMN, ADC, TAW
